# Supplementary material for: Can sterilization of disposable face masks be an alternative for imported face masks? A nationwide field study including 19 sterilization departments and 471 imported brand types during COVID-19 shortages
Source: PubMed Central journal article supplement (PMC8439445; doi:10.1371/journal.pone.0257468), 2021-09-14

Meetrapport/measurement report nr.

470

DATE

28-7-2021

Lighthouse 3100 output

Client name

NL Mask BV

Mouth Mask Brand CO-01 FFP2 NR

FFP2

New, imported mask

address

wegalaan 11, 9742 NA, Groningen

Mouth Mask Type Corodesa

Sample 2

email

info@nlmask.com

sterilised/new New

New

Phone

Samples Corodesa CO-01

CE 2163

GreenCycl BV

3454 PV De Meern

info@greencycl.nl

Tel.: 030 – 602 38 30

Operator Name

BvS

time

16:48

FOTO nr

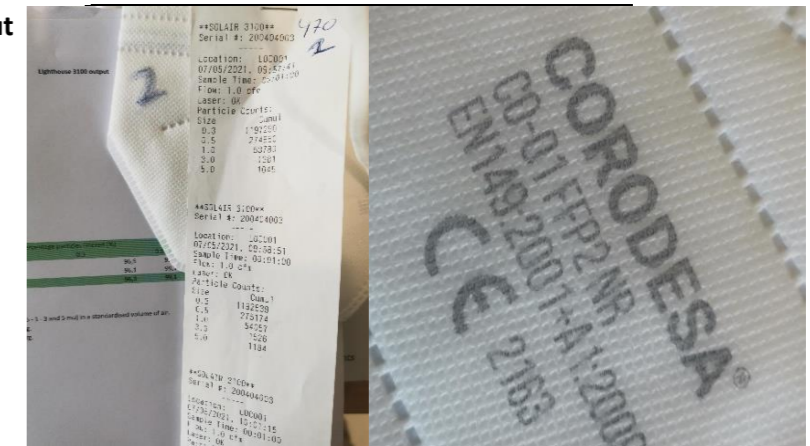

Particle measurements

Warning: The user of this mask may experience severe difficulty breathing due to the mask restricting the airflow. The mask has a pressure drop [dPa] of 308,0. A pressure drop [dPA] > 600 may give sam breathing difficalty.

Flow 1F^3 measurement time 1min

| particle size           | 0.3     | 0.5    | 1.0   | 3.0 | 5.0 |
|-------------------------|---------|--------|-------|-----|-----|
| environment particles 1 | 1543224 | 268616 | 50105 | 406 | 298 |
| environment particles 2 | 1543224 | 268616 | 50105 | 406 | 298 |
| avarage                 | 1543224 | 268616 | 50105 | 406 | 298 |

particles counted 0.3 mu 0.5 mu 1.0 mu 3 mu 5 mu percentage particles filtered [%]

| Sample II            | 0.3     | 0.5    | 1.0   | 3.0 | 5.0 | 0.3  | 0.5  | 1.0  | 3.0   | 5.0   |
|----------------------|---------|--------|-------|-----|-----|------|------|------|-------|-------|
| sample 4             | 50213   | 2790   | 226   | 0   | 0   | 97   | 99   | 100  | 100   | 100   |
| sample 9             | 33356   | 1774   | 188   | 0   | 0   | 98   | 99   | 100  | 100   | 100   |
| sample 2             | 59667   | 3287   | 316   | 0   | 0   | 96   | 99   | 99   | 100   | 100   |
| sample 3             | 51792   | 2866   | 255   | 0   | 0   | 97   | 99   | 99   | 100   | 100   |
| sample 1             | 61712   | 3542   | 314   | 6   | 3   | 96   | 99   | 99   | 99    | 99    |
| sample 10            | 34399   | 1792   | 175   | 0   | 0   | 98   | 99   | 100  | 100   | 100   |
| sample 6             | 43998   | 3736   | 64    | 1   | 1   | 97   | 99   | 100  | 100   | 100   |
| sample 7             | 38336   | 2020   | 177   | 0   | 0   | 98   | 99   | 100  | 100   | 100   |
| sample 5             | 44545   | 2454   | 231   | 0   | 0   | 97   | 99   | 100  | 100   | 100   |
| sample 8             | 43998   | 3736   | 64    | 1   | 1   | 97   | 99   | 100  | 100   | 100   |
| mean                 | 46511.5 | 2530.5 | 252.0 | 0.0 | 0.0 | 97.0 | 99.1 | 99.5 | 100.0 | 100.0 |
| SD                   |         |        |       |     |     | 0.6  | 0.3  | 0.2  | 0.5   | 0.3   |
| Percentage from mean |         |        |       |     |     | 0.6  | 0.3  | 0.2  | 0.5   | 0.3   |

Pressure drop measurements

Warning: The user of this mask may experience severe difficulty breathing due to the mask restricting the airflow. The mask has a pressure drop [dPa] of 641,2. A pressure drop [dPA] > 600 may give breathing difficalty.

Flow 1F^3 measurement time 1min

|           |       |      |
|-----------|-------|------|
| sample 6  | 634.7 | 0.66 |
| sample 1  | 634.7 | 0.68 |
| sample 2  | 644.0 | 0.65 |
| sample 8  | 644   | 0.67 |
| sample 10 | 644   | 0.66 |
| sample 5  | 634.7 | 0.66 |
| sample 7  | 644.0 | 0.66 |
| sample 4  | 644.0 | 0.67 |
| sample 9  | 644   | 0.65 |
| sample 3  | 644.0 | 0.66 |
| mean      | 641.2 | 0.7  |
| SD        | 4.5   | 0.0  |

From LLogM

Important note:

- Measurements are done with dry environmental particles according to our own standards. The percentages indicate the percentage of particles filtered per particle size category (0.3 0.5 1 and 5  $\mu$ ) in a standardised volume of air. Measurements are done at 28 liter/min. More information can be found on [www.greencycl.org](http://www.greencycl.org).
- Each sample is 1 mask. All measurements will be published anonymously on [www.greencycl.org](http://www.greencycl.org).
- Sample 1&2 represent 2 different locations on the first masker

Meetrapport/measurement report nr.  
Client name  
adress  
email  
Phone

|                             |
|-----------------------------|
| 467                         |
| JBZ                         |
| <a href="#">Rijnzathe 2</a> |
|                             |
|                             |

DATE  
Mouth Mask Branc GB2626-2006 \*  
Mouth Mask Type KN95 Chinese  
sterilised/new New

|           |
|-----------|
| 28-7-2021 |
| KN95      |
| Sample 1  |
| New       |

Lighthouse 3100 output  
New, imported mask

GreenCycl BV  
3454 PV De Meern  
info@greencycl.nl  
Tel.: 030 – 602 38 30

Operator Name  
time  
FOTO nr

|       |
|-------|
| BvS   |
| 16:22 |
|       |

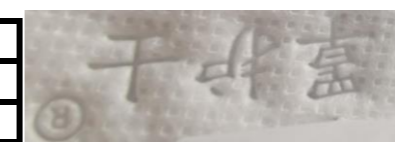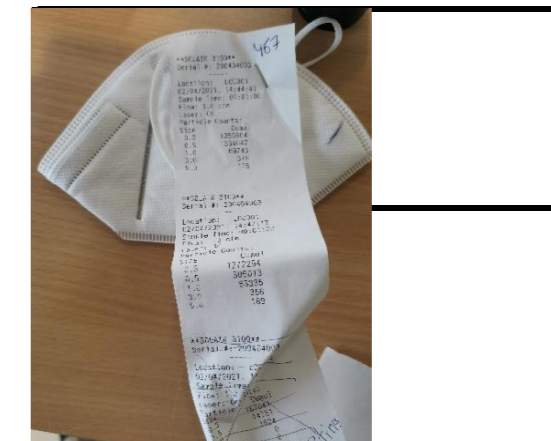

**Particle measurements**

Warning: The user of this mask may experience severe difficulty breathing due to the mask restricting the airflow. The mask has a pressure drop [dPa] of 308,0. A pressure drop [dPA] > 600 may give sam breathing difficalty.

| Flow measurement time       | 1F^3 1min       |                |               |            |            | percentage particles filtered [%] |             |             |             |             |
|-----------------------------|-----------------|----------------|---------------|------------|------------|-----------------------------------|-------------|-------------|-------------|-------------|
| particle size               | 0.3             | 0.5            | 1.0           | 3.0        | 5.0        | 0.3                               | 0.5         | 1.0         | 3.0         | 5.0         |
| environment particles 1     | 1404370         | 292847         | 57379         | 484        | 362        |                                   |             |             |             |             |
| environment particles 2     | 1404370         | 292847         | 57379         | 484        | 362        |                                   |             |             |             |             |
| avarage                     | <b>1404370</b>  | <b>292847</b>  | <b>57379</b>  | <b>484</b> | <b>362</b> |                                   |             |             |             |             |
| particles counted           | 0.3 mu          | 0.5 mu         | 1.0 mu        | 3 mu       | 5 mu       |                                   |             |             |             |             |
| <b>Sample II</b>            |                 |                |               |            |            |                                   |             |             |             |             |
| sample 8                    | 181594          | 14771          | 1663          | 0          | 0          | 87                                | 95          | 97          | 100         | 100         |
| sample 9                    | 188908          | 15166          | 1590          | 0          | 0          | 87                                | 95          | 97          | 100         | 100         |
| sample 2                    | 178964          | 14165          | 1511          | 5          | 4          | 87                                | 95          | 97          | 99          | 99          |
| sample 4                    | 172930          | 14324          | 1510          | 0          | 0          | 88                                | 95          | 97          | 100         | 100         |
| sample 10                   | 182867          | 15079          | 1631          | 0          | 0          | 87                                | 95          | 97          | 100         | 100         |
| sample 6                    | 168435          | 13564          | 1451          | 0          | 0          | 88                                | 95          | 97          | 100         | 100         |
| sample 7                    | 187777          | 15334          | 1620          | 0          | 0          | 87                                | 95          | 97          | 100         | 100         |
| sample 1                    | 134797          | 14314          | 1376          | 0          | 0          | 90                                | 95          | 98          | 100         | 100         |
| sample 5                    | 172477          | 13851          | 1402          | 0          | 0          | 88                                | 95          | 98          | 100         | 100         |
| sample 3                    | 180156          | 14564          | 1552          | 0          | 0          | 87                                | 95          | 97          | 100         | 100         |
| <b>mean</b>                 | <b>183936.0</b> | <b>14665.5</b> | <b>1550.5</b> | <b>2.5</b> | <b>2.0</b> | <b>86.9</b>                       | <b>95.0</b> | <b>97.3</b> | <b>99.5</b> | <b>99.4</b> |
| <b>SD</b>                   |                 |                |               |            |            | <b>1.1</b>                        | <b>0.2</b>  | <b>0.2</b>  | <b>0.3</b>  | <b>0.3</b>  |
| <b>Percentage from mean</b> |                 |                |               |            |            | <b>1.3</b>                        | <b>0.2</b>  | <b>0.2</b>  | <b>0.3</b>  | <b>0.4</b>  |

**Pressure drop measurements**

Warning: The user of this mask may experience severe difficulty breathing due to the mask restricting the airflow. The mask has a pressure drop [dPa] of 392,9. A pressure drop [dPA] > 600 may give breathing difficalty.

| Flow measurement time | 1F^3 1min    | From LLogM |
|-----------------------|--------------|------------|
| sample 7              | 392.0        | 0.66       |
| sample 10             | 392          | 0.66       |
| sample 2              | 382.7        | 0.65       |
| sample 5              | 392.0        | 0.66       |
| sample 4              | 401.3        | 0.67       |
| sample 6              | 392.0        | 0.66       |
| sample 1              | 401.3        | 0.68       |
| sample 8              | 401          | 0.67       |
| sample 9              | 383          | 0.65       |
| sample 3              | 392.0        | 0.66       |
| <b>mean</b>           | <b>393.2</b> | <b>0.7</b> |
| <b>SD</b>             | <b>6.9</b>   | <b>0.0</b> |

Important note:

- Measurements are done with dry environmental particles according to our own standards. The percentages indicate the percentage of particles filtered per particle size category (0.3 0.5 1 and 5  $\mu$ ) in a standardised volume of air. Measurements are done at 28 liter/min. More information can be found on [www.greencycl.org](http://www.greencycl.org).
- Each sample is 1 mask. All measurements will be published anonymously on [www.greencycl.org](http://www.greencycl.org).
- Sample 1&2 represent 2 different locations on the first masker

Meetrapport/measurement report nr.

470

DATE

28-7-2021

Lighthouse 3100 output

Client name

Dromedary Industries

Mouth Mask Brand MCZ-KZ

FFP2

address

Duindistelstraat 11, 8300 Knokke-Zoute

Mouth Mask Type Mezorrisson

Sample 3

New, imported mask

email

[franzjr@dromedarvindustries.com](mailto:franzjr@dromedarvindustries.com)

sterilised/new New FFP2

New

Phone

N/A

CE 0370

GreenCycl BV

Operator Name

BvS

3454 PV De Meern

time

17:38

info@greencycl.nl

FOTO nr

Tel.: 030 – 602 38 30

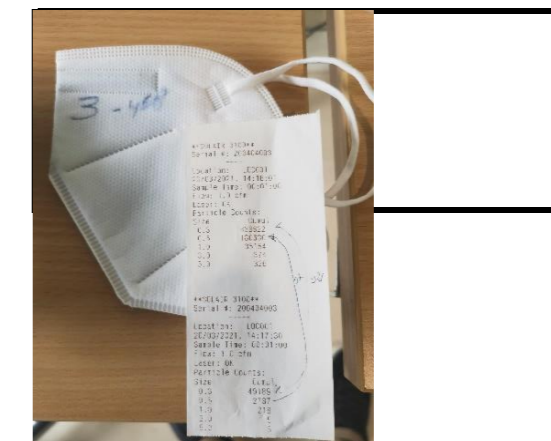

Particle measurements

benchmarking Warning: The user of this mask may experience severe difficulty breathing due to the mask restricting the airflow. The mask has a pressure drop [dPa] of 308,0. A pressure drop [dPA] > 600 may give sam breathing difficalty.

| Flow                    | 1F^3 |         |        |       |     |     |
|-------------------------|------|---------|--------|-------|-----|-----|
| measurement time        | 1min |         |        |       |     |     |
| particle size           |      | 0.3     | 0.5    | 1.0   | 3.0 | 5.0 |
| environment particles 1 |      | 1464709 | 307809 | 59699 | 806 | 593 |
| environment particles 2 |      | 1464709 | 307809 | 59699 | 806 | 593 |
| avarage                 |      | 1464709 | 307809 | 59699 | 806 | 593 |

| particles counted           | 0.3 mu         | 0.5 mu        | 1.0 mu       | 3 mu       | 5 mu       | percentage particles filtered [%] | 0.3         | 0.5         | 1.0         | 3.0         | 5.0          |
|-----------------------------|----------------|---------------|--------------|------------|------------|-----------------------------------|-------------|-------------|-------------|-------------|--------------|
| <b>Sample II</b>            |                |               |              |            |            |                                   |             |             |             |             |              |
| sample 5                    | 82562          | 6938          | 870          | 1          | 0          |                                   | 94          | 98          | 99          | 100         | 100          |
| sample 10                   | 75997          | 6347          | 766          | 0          | 0          |                                   | 95          | 98          | 99          | 100         | 100          |
| sample 2                    | 73306          | 6052          | 765          | 2          | 0          |                                   | 95          | 98          | 99          | 100         | 100          |
| sample 3                    | 77823          | 6415          | 786          | 2          | 2          |                                   | 95          | 98          | 99          | 100         | 100          |
| sample 8                    | 84054          | 7161          | 906          | 1          | 0          |                                   | 94          | 98          | 98          | 100         | 100          |
| sample 1                    | 83485          | 7004          | 852          | 2          | 2          |                                   | 94          | 98          | 99          | 100         | 100          |
| sample 6                    | 79882          | 6892          | 641          | 0          | 0          |                                   | 95          | 98          | 99          | 100         | 100          |
| sample 7                    | 81314          | 6916          | 839          | 1          | 0          |                                   | 94          | 98          | 99          | 100         | 100          |
| sample 9                    | 81256          | 6914          | 843          | 0          | 0          |                                   | 94          | 98          | 99          | 100         | 100          |
| sample 4                    | 75088          | 6442          | 809          | 0          | 0          |                                   | 95          | 98          | 99          | 100         | 100          |
| <b>mean</b>                 | <b>74651.5</b> | <b>6199.5</b> | <b>765.5</b> | <b>1.0</b> | <b>0.0</b> |                                   | <b>94.9</b> | <b>98.0</b> | <b>98.7</b> | <b>99.9</b> | <b>100.0</b> |
| <b>SD</b>                   |                |               |              |            |            |                                   | <b>0.3</b>  | <b>0.1</b>  | <b>0.1</b>  | <b>0.1</b>  | <b>0.1</b>   |
| <b>Percentage from mean</b> |                |               |              |            |            |                                   | <b>0.3</b>  | <b>0.1</b>  | <b>0.1</b>  | <b>0.1</b>  | <b>0.1</b>   |

Pressure drop measurements

benchmarking Warning: The user of this mask may experience severe difficulty breathing due to the mask restricting the airflow. The mask has a pressure drop [dPa] of 372,4. A pressure drop [dPA] > 600 may give breathing difficalty.

| Flow             | 1F^3         |  |  |  |  |            |
|------------------|--------------|--|--|--|--|------------|
| measurement time | 1min         |  |  |  |  |            |
| sample 4         | 373.3        |  |  |  |  | 0.67       |
| sample 8         | 364          |  |  |  |  | 0.67       |
| sample 2         | 373.3        |  |  |  |  | 0.65       |
| sample 10        | 373          |  |  |  |  | 0.66       |
| sample 1         | 364.0        |  |  |  |  | 0.68       |
| sample 5         | 373.3        |  |  |  |  | 0.66       |
| sample 6         | 382.7        |  |  |  |  | 0.66       |
| sample 7         | 373.3        |  |  |  |  | 0.66       |
| sample 3         | 382.7        |  |  |  |  | 0.66       |
| sample 9         | 364          |  |  |  |  | 0.65       |
| <b>mean</b>      | <b>372.4</b> |  |  |  |  | <b>0.7</b> |
| <b>SD</b>        | <b>6.9</b>   |  |  |  |  | <b>0.0</b> |

From LLogM

Important note:

- Measurements are done with dry environmental particles according to our own standards. The percentages indicate the percentage of particles filtered per particle size category (0.3 0.5 1 and 5  $\mu$ ) in a standardised volume of air. Measurements are done at 28 liter/min. More information can be found on [www.greencycl.org](http://www.greencycl.org).
- Each sample is 1 mask. All measurements will be published anonymously on [www.greencycl.org](http://www.greencycl.org).
- Sample 1&2 represent 2 different locations on the first masker

| masker material type | label code | output | pressure [Pa] | pressure drop [delta Pa] |
|----------------------|------------|--------|---------------|--------------------------|
| atmosphere           | ref value  | 0.24   | -9.33         | -9.33                    |

**Pressure measurement on different surface part per measurement!**

|              |   |               |                           |              |                              |
|--------------|---|---------------|---------------------------|--------------|------------------------------|
| 27 July 2021 |   | 470           | NL Mask BV Corodesa FFP2  |              | 16:48                        |
| Sample 9     | 1 | Corodesa FFP2 | 0.93                      | 634.7        | 644.0 #470                   |
| Sample 7     |   | Corodesa FFP2 | 0.93                      | 634.7        | 644.0 #470                   |
| Sample 2     |   | Corodesa FFP2 | 0.93                      | 634.7        | 644.0 #470                   |
| Sample 5     |   | Corodesa FFP2 | 0.92                      | 625.3        | 634.7 #470                   |
| Sample 4     |   | Corodesa FFP2 | 0.93                      | 634.7        | 644.0 #470                   |
| Sample 6     |   | Corodesa FFP2 | 0.92                      | 625.3        | 634.7 #470                   |
| Sample 10    |   | Corodesa FFP2 | 0.93                      | 634.7        | 644.0 #470                   |
| Sample 8     |   | Corodesa FFP2 | 0.93                      | 634.7        | 644.0 #470                   |
| Sample 1     |   | Corodesa FFP2 | 0.92                      | 625.3        | 634.7 #470                   |
| Sample 3     |   | Corodesa FFP2 | 0.93                      | 634.7        | 644.0 #470                   |
| <b>Mean</b>  |   |               |                           | <b>631.2</b> | <b>640.5</b>                 |
| <b>SD</b>    |   |               |                           | <b>4.5</b>   | <b>0.703895673 % of mean</b> |
| 27 July 2021 |   | 467           | JBZ KN95 mask             |              | 16:22                        |
| Sample 3     | 2 | JBZ KN95      | 0.66                      | 382.7        | 392.0 #472                   |
| Sample 10    |   | JBZ KN95      | 0.66                      | 382.7        | 392.0 #472                   |
| Sample 2     |   | JBZ KN95      | 0.65                      | 373.3        | 382.7 #472                   |
| Sample 1     |   | JBZ KN95      | 0.67                      | 392.0        | 401.3 #472                   |
| Sample 4     |   | JBZ KN95      | 0.67                      | 392.0        | 401.3 #472                   |
| Sample 8     |   | JBZ KN95      | 0.67                      | 392.0        | 401.3 #472                   |
| Sample 6     |   | JBZ KN95      | 0.66                      | 382.7        | 392.0 #472                   |
| Sample 7     |   | JBZ KN95      | 0.66                      | 382.7        | 392.0 #472                   |
| Sample 9     |   | JBZ KN95      | 0.65                      | 373.3        | 382.7 #472                   |
| Sample 5     |   | JBZ KN95      | 0.66                      | 382.7        | 392.0 #472                   |
| <b>Mean</b>  |   |               |                           | <b>383.8</b> | <b>393.2</b>                 |
| <b>SD</b>    |   |               |                           | <b>6.9</b>   | <b>1.751622654 % of mean</b> |
| 27 July 2021 |   | 468           | Dromedary Industries FFP2 |              | 17:38                        |
| Sample 9     | 3 | JBZ KN95      | 0.63                      | 354.7        | 364.0 #468                   |
| Sample 1     |   | JBZ KN95      | 0.63                      | 354.7        | 364.0 #468                   |
| Sample 10    |   | JBZ KN95      | 0.64                      | 364.0        | 373.3 #468                   |
| Sample 3     |   | JBZ KN95      | 0.65                      | 373.3        | 382.7 #468                   |

|             |          |      |              |              |                              |
|-------------|----------|------|--------------|--------------|------------------------------|
| Sample 7    | JBZ KN95 | 0.64 | 364.0        | 373.3        | #468                         |
| Sample 6    | JBZ KN95 | 0.65 | 373.3        | 382.7        | #468                         |
| Sample 5    | JBZ KN95 | 0.64 | 364.0        | 373.3        | #468                         |
| Sample 8    | JBZ KN95 | 0.63 | 354.7        | 364.0        | #468                         |
| Sample 2    | JBZ KN95 | 0.64 | 364.0        | 373.3        | #468                         |
| Sample 4    | JBZ KN95 | 0.64 | 364.0        | 373.3        | #468                         |
| <b>Mean</b> |          |      | <b>365.2</b> | <b>374.5</b> |                              |
| <b>SD</b>   |          |      |              | <b>6.9</b>   | <b>1.838931726 % of mean</b> |

| # Channels | Name  | Value    | Scaling Equation | Scaled   | Graph |
|------------|-------|----------|------------------|----------|-------|
| 4          | AIN0  | 0.636592 | y=a              | 0.636592 | ●     |
|            | AIN1  | 3.166027 | y=b              | 3.166027 | ●     |
|            | AIN2  | 0.601925 | y=c              | 0.601925 | ●     |
|            | AIN3  | 1.307316 | y=d              | 1.307316 | ●     |
|            | AIN4  | 0.000000 | y=e              | 0.000000 | ●     |
|            | AIN5  | 0.000000 | y=f              | 0.000000 | ●     |
|            | AIN6  | 0.000000 | y=g              | 0.000000 | ●     |
|            | AIN7  | 0.000000 | y=h              | 0.000000 | ●     |
|            | AIN8  | 0.000000 | y=i              | 0.000000 | ●     |
|            | AIN9  | 0.000000 | y=j              | 0.000000 | ●     |
|            | AIN10 | 0.000000 | y=k              | 0.000000 | ●     |
|            | AIN11 | 0.000000 | y=l              | 0.000000 | ●     |
|            | AIN12 | 0.000000 | y=m              | 0.000000 | ●     |
|            | AIN13 | 0.000000 | y=n              | 0.000000 | ●     |
|            | AIN14 | 0.000000 | y=o              | 0.000000 | ●     |
|            | AIN15 | 0.000000 | y=p              | 0.000000 | ●     |

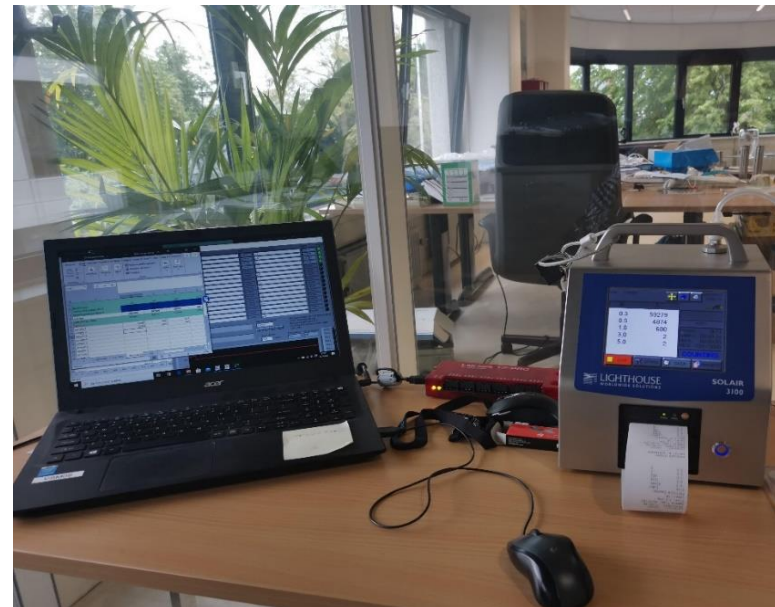

Supplement: pone.0257468.s002.pdf [file pone.0257468.s002.pdf]
