# Supplementary material for: Can sterilization of disposable face masks be an alternative for imported face masks? A nationwide field study including 19 sterilization departments and 471 imported brand types during COVID-19 shortages
Source: PubMed Central journal article supplement (PMC8439445; doi:10.1371/journal.pone.0257468), 2021-09-14

Testing pressure drop over filter material Supplemental file 8

| #  | special case (brand)      | output | pressure [Pa] | pressure drop [delta Pa] | reason (0.3/0.5/1/5 mu)    | mean all | 0 pressure drop [delta Pa] | in bar       | shape           | good     | middle   | bad         |
|----|---------------------------|--------|---------------|--------------------------|----------------------------|----------|----------------------------|--------------|-----------------|----------|----------|-------------|
| 1  | bolis                     | 0,917  | -233,333333   | -233,333333              | scoorde 99/99/100/100      | 1        | 0,7                        | 251,0666667  | cone            | 0,260777 | 0        | 0           |
| 2  | IVROU China shape         | 0,83   | 541,333333    | 541,333333               | scoorde 99/99/100/100      | 2        | 0,7                        | 261,333333   | cone            | 0,271441 | 0        | 0           |
| 3  | IVROU 3M shape            | 0,74   | 457,333333    | 457,333333               | scoorde 99/99/100/100      | 3        | 0,7                        | 298,6666667  | wide beak model | 0,233146 | 0        | 0           |
| 4  | chinese KN95              | 4,217  | 3702,533333   | 3702,533333              | scoorde 99/99/100/100      | 4        | 0,7                        | 382,6666667  | cone            | 0,397467 | 0        | 0           |
| 5  | RYK 3D protectce KN95     | 0,8    | 513,333333    | 513,333333               | scoorde 99/99/100/100      | 5        | 0,7                        | 410,6666667  | cone            | 0,42655  | 0        | 0           |
| 6  | DrCare+ moswl 9550        | 0,91   | 616           | 616                      | scoorde 99/99/100/100      | 6        | 0,7                        | 420          | cone            | 0,436245 | 0        | 0           |
| 7  | Tomson Newt               | 0,705  | 424,6666667   | 424,6666667              | scoorde 99/99/100/100      | 7        | 0,7                        | 421,8666667  | cone            | 0,438183 | 0        | 0           |
| 8  | EAC                       | 0,84   | 550,6666667   | 550,6666667              | scoorde 100/100/100/100    | 8        | 0,7                        | 434          | cone            | 0,450786 | 0        | 0           |
| 9  | Unknown                   | 0,509  | 241,733333    | 241,733333               | scoorde 99.6/99.8/100/100/ | 9        | 0,7                        | 449,8666667  | cone            | 0,467266 | 0        | 0           |
| 10 | Ryzur (Wit)               | 0,732  | 449,8666667   | 449,8666667              | scoorde 100/100/100/100    | 10       | 0,7                        | 459,2        | cone            | 0,476961 | 0        | 0           |
| 11 | Air Queen                 | 0,68   | 401,333333    | 401,333333               | scoorde 98/100/100/100     | 11       | 0,7                        | 466,6666667  | cone            | 0,484716 | 0        | 0           |
| 12 | Zhonglang                 | 1,009  | 708,4         | 708,4                    | scoorde 97/100/100/100     | 12       | 0,7                        | 486,2666667  | cone            | 0,505074 | 0        | 0           |
| 13 | Purvigor                  | 1,169  | 857,733333    | 857,733333               | scoorde 95/99/100/100      | 13       | 0,7                        | 522,6666667  | cone            | 0,542882 | 0        | 0           |
| 14 | KN95 (Blue)               | 0,65   | 373,333333    | 373,333333               | scoorde 99/100/100/100     | 14       | 0,7                        | 550,6666667  | cone            | 0,571965 | 0        | 0           |
| 15 | airmax                    | 0,761  | 476,933333    | 476,933333               | scoorde 99/100/100/100     | 15       | 0,7                        | 560          | cone            | 0,58166  | 0        | 0           |
| 16 | 1206 GB2626-2006KN95      | 0,722  | 440,533333    | 440,533333               | scoorde 99/100/100/100     | 16       | 0,7                        | 569,333333   | cone            | 0,591354 | 0        | 0           |
| 17 | Newt KN95 (Mask 1 from te | 0,692  | 412,533333    | 412,533333               | scoorde 95/99/100/100      | 17       | 0,7                        | 572,133333   | cone            | 0,594262 | 0        | 0           |
| 18 | Newt KN95 (Mask 2 from te | 0,69   | 410,6666667   | 410,6666667              | scoorde 99/100/100/100     | 18       | 0,7                        | 606,6666667  | cone            | 0,630131 | 0        | 0           |
| 19 | Huata HT9510              | 1,045  | 742           | 742                      | scoorde 98/100/100/100     | 19       | 0,7                        | 625,333333   | cone            | 0,649519 | 0,64952  | 0           |
| 20 | Huata HT9510              | 1,052  | 748,533333    | 748,533333               | scoorde 99/100/100/100     | 20       | 0,7                        | 717,733333   | cone            | 0,745494 | 0,745494 | 0           |
| 21 | Multi Purpose Face Mask   | 0,89   | 597,333333    | 597,333333               | scoorde 99/100/100/100     | 21       | 0,7                        | 751,333333   | cone            | 0,780393 | 0,780393 | 0           |
| 22 | GIME 9122                 | 0,853  | 562,8         | 562,8                    | scoorde 95/99/100/100      | 22       | 0,7                        | 757,8666667  | cone            | 0,787179 | 0,787179 | 0           |
| 23 | Mask #27 (3m 8833)        | 0,85   | 560           | 560                      | scoorde 96/99/100/100      | 23       | 0,7                        | 867,0666667  | cone            | 0,900603 | 0,900603 | 0           |
| 24 | Model 3 CE FFP3           | 0,56   | 289,333333    | 289,333333               | scoorde 99/100/100/100     | 24       | 0,7                        | 3220         | cone            |          |          | 3,344542149 |
| 25 | Kinyoka                   | 4,5    | 3966,67       | 3966,67                  | scoorde 99/100/100/100     | 25       | 0,7                        | 3593         | cone            |          |          | 3,731968926 |
| 26 | white label               | 3,7    | 3220,00       | 3220,00                  | scoorde 98/100/100/100     | 26       | 0,7                        | 3711,8666667 | cone            |          |          | 3,85543308  |
| 27 | white label               | 4,1    | 3593,33       | 3593,33                  | scoorde 99/100/100/100     | 27       | 0,7                        | 3976         | cone            |          |          | 4,129782479 |

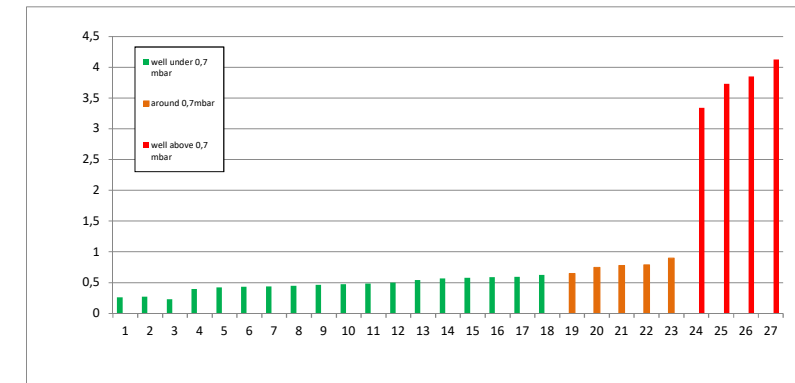

Supplement: pone.0257468.s008.pdf [file pone.0257468.s008.pdf]
