# Supplementary material for: Can sterilization of disposable face masks be an alternative for imported face masks? A nationwide field study including 19 sterilization departments and 471 imported brand types during COVID-19 shortages
Source: PubMed Central journal article supplement (PMC8439445; doi:10.1371/journal.pone.0257468), 2021-09-14
Supplement: pone.0257468.s001.pdf [file pone.0257468.s001.pdf]

## S1 File, DSC, XRD and FTIR tests on face mask materials

Differences in mask material was analysed by chemically and thermally comparing the fabric of the two most common types of face masks, showing different PFE after being sterilised once or twice with 121 °C or H<sub>2</sub>O<sub>2</sub> plasma sterilisation methods. A Differential Scanning Calorimetry (DSC), X-Ray Diffraction (XRD) and Transform InfraRed spectroscopy (FTIR) were conducted.

The chemical characterization test was conducted with a Fourier Transform InfraRed spectroscopy (FTIR) (Nicolet 6700 from ThermoFisher Inc., USA) to narrow down the potential polymer types that were used. Spectra was collected from 650 to 4000 cm<sup>-1</sup> at a resolution of 2 cm<sup>-1</sup> and averaged over 128 scans.

Thermal analysis of the sample material was conducted using Differential Scanning Calorimetry (DSC) calorimeter (PerkinElmer Diamond, <https://www.perkinelmer.com>), Figure 1, to investigate the thermal properties of the polymer layers. The method is based on the characteristic melting and crystallization transitions T<sub>m</sub>, which reflect the physical and chemical changes, endothermic and exothermic processes, or changes in heat capacity [20]. Samples of approximately 5 mg (figure 2) were cut and heated with a heating rate of 10 °C/min. The temperature scan was set to -25 to 180 and 250 °C and the cooling was conducted by nitrogen gas purge.

Additionally, the materials were tested with X-Ray Diffraction (XRD). XRD is a non-destructive test method used to analyse the structure of crystalline materials by identifying the crystalline phases present in a material and therefore reveals the chemical composition information. The experiments were conducted with a Bruker D8 Advance diffractometer (2theta-theta scan, often called Bragg-Brentano or focusing geometry) with Co K $\alpha$  source ( $\lambda$  = 1.7889 Å, 35 kV and 40 mA) with Lynxeye position sensitive detector. The measurement range on a motorised varied divergent slit was set from 5 to 50 degrees with step size of 0.02 mm. A measuring time of 0.1 second per step was employed. Bruker software (DiffracSuite.EVA version 5.1, Bruker, USA) was used to interpret the data.

Furthermore an Infrared spectroscopy (FTIR) was conducted.

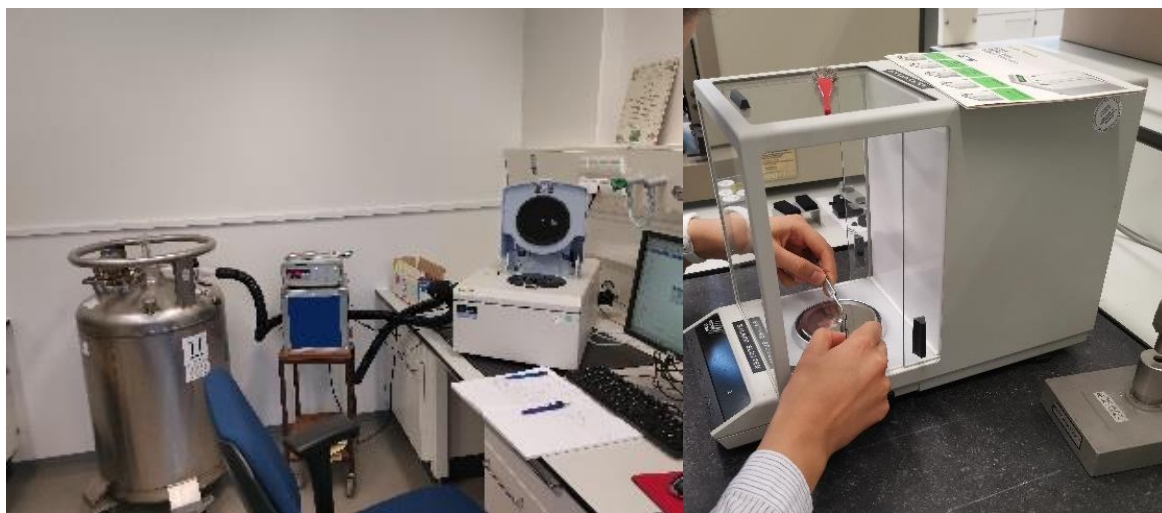

**Figure 1. Measurement setups. Left, Differential Scanning Calorimetry (DSC). Right, samples of 5 mg are accurately prepared for XRD measurements.**
