# Supplementary material for: Can sterilization of disposable face masks be an alternative for imported face masks? A nationwide field study including 19 sterilization departments and 471 imported brand types during COVID-19 shortages
Source: PubMed Central journal article supplement (PMC8439445; doi:10.1371/journal.pone.0257468), 2021-09-14
Supplement: pone.0257468.s003.pdf [file pone.0257468.s003.pdf]

| Validation PFE outcome of particle counter setup against continues flow system of Delft |                  |               |                |          |           |           | Supplemental file 3 |      |      |      |       | Delft/Greencycl<br>Particle test<br>mean value [%] | delft/RIVM<br>continues flow test<br>available emasurements [%] | delft mean<br>(when multiple measurements)<br>mean value [%] | difference [%]<br>with RIVM data<br>[%] |         |
|-----------------------------------------------------------------------------------------|------------------|---------------|----------------|----------|-----------|-----------|---------------------|------|------|------|-------|----------------------------------------------------|-----------------------------------------------------------------|--------------------------------------------------------------|-----------------------------------------|---------|
| index nr                                                                                | type of hospital | sterilisation | type of mask   | standard | sample nr | data      | status              | 0,3  | 0,5  | 1,0  | 5,0   |                                                    |                                                                 |                                                              |                                         | avarage |
|                                                                                         |                  |               |                |          |           |           |                     | 0,3  | 0,5  | 1,0  | 5,0   |                                                    |                                                                 |                                                              |                                         |         |
| 88                                                                                      | Uni Hospital     | 121 steam     | 3M 1862+       | FFP2     | sample 5  | 27-3-2020 | new                 | 93,3 | 98,1 | 99,5 | 99,8  | 97,7                                               |                                                                 |                                                              |                                         |         |
| 89                                                                                      | Uni Hospital     | 121 steam     | 3M 1872v+      | FFP2     | sample 1  | 27-3-2020 | new                 | 95,6 | 98,8 | 99,5 | 98,8  | 98,2                                               |                                                                 |                                                              |                                         |         |
| 90                                                                                      | Uni Hospital     | 121 steam     | 3M 1872v+      | FFP2     | sample 2  | 27-3-2020 | new                 | 97,8 | 99,5 | 99,9 | 100,0 | 99,3                                               |                                                                 |                                                              |                                         |         |
| 91                                                                                      | Uni Hospital     | 121 steam     | 3M 1872v+      | FFP2     | sample 3  | 27-3-2020 | new                 | 96,1 | 99,0 | 99,6 | 100,0 | 98,7                                               |                                                                 |                                                              |                                         |         |
| 92                                                                                      | Uni Hospital     | 121 steam     | 3M 1872v+      | FFP2     | sample 4  | 27-3-2020 | new                 | 95,3 | 98,8 | 99,7 | 100,0 | 98,4                                               |                                                                 |                                                              |                                         |         |
| 93                                                                                      | Uni Hospital     | 121 steam     | 3M 1872v+      | FFP2     | sample 5  | 27-3-2020 | new                 | 92,1 | 97,6 | 99,0 | 99,8  | 97,1                                               |                                                                 |                                                              |                                         |         |
| 122                                                                                     | Uni Hospital     | 121 steam     | 3M 1872v+      | FFP2     | sample 1  | 30-3-2020 | new                 | 89,8 | 95,4 | 97,6 | 100,0 | 95,7                                               |                                                                 |                                                              |                                         |         |
| 123                                                                                     | Uni Hospital     | 121 steam     | 3M 1872v+      | FFP2     | sample 2  | 30-3-2020 | used                | 91,8 | 96,6 | 98,4 | 100,0 | 96,7                                               |                                                                 |                                                              |                                         |         |
| 124                                                                                     | Uni Hospital     | 121 steam     | 3M 1872v+      | FFP2     | sample 3  | 30-3-2020 | used                | 92,4 | 96,9 | 98,6 | 100,0 | 97,0                                               |                                                                 |                                                              |                                         |         |
| 125                                                                                     | Uni Hospital     | 121 steam     | 3M 1872v+      | FFP2     | sample 1  | 2-4-2020  | used                | 90,1 | 94,9 | 97,9 | 99,5  | 95,6                                               |                                                                 |                                                              |                                         |         |
| 126                                                                                     | Uni Hospital     | 121 steam     | 3M 1872v+      | FFP2     | sample 2  | 2-4-2020  | used                | 90,7 | 95,2 | 97,7 | 100,0 | 95,9                                               |                                                                 |                                                              |                                         |         |
| 135                                                                                     | hospital         | 121 steam     | 3M 1872v+      | FFP2     | sample 1  | 1-4-2020  | used                | 94,8 | 96,4 | 96,9 | 100,0 | 97,0                                               |                                                                 |                                                              |                                         |         |
| 136                                                                                     | hospital         | 121 steam     | 3M 1872v+      | FFP2     | sample 2  | 1-4-2020  | 1xused              | 98,1 | 99,3 | 99,7 | 99,4  | 99,1                                               |                                                                 |                                                              |                                         |         |
| 137                                                                                     | hospital         | 3x 121 steam  | 3M 1872v+      | FFP2     | sample 1  | 1-4-2020  | 1xused              | 97,5 | 99,1 | 99,7 | 99,4  | 98,9                                               |                                                                 |                                                              |                                         |         |
| 138                                                                                     | hospital         | 3x 121 steam  | 3M 1872v+      | FFP2     | sample 2  | 1-4-2020  | 1xused              | 94,4 | 96,4 | 99,6 | 96,7  | 96,8                                               |                                                                 |                                                              |                                         |         |
| 139                                                                                     | hospital         | 5x 121 steam  | 3M 1872v+      | FFP2     | sample 1  | 1-4-2020  | 1xused              | 93,6 | 96,7 | 97,7 | 99,4  | 96,9                                               |                                                                 |                                                              |                                         |         |
| 140                                                                                     | hospital         | 5x 121 steam  | 3M 1872v+      | FFP2     | sample 2  | 1-4-2020  | 1xused              | 97,1 | 99,0 | 99,6 | 100,0 | 98,9                                               |                                                                 |                                                              |                                         |         |
| 158                                                                                     | independent CSA  | 3x 121 steam  | 3M 1872v+      | FFP2     | sample 1  | 6-4-2020  | 3x used             | 80,0 | 97,3 | 95,8 | 86,3  | 89,9                                               |                                                                 |                                                              |                                         |         |
| 159                                                                                     | independent CSA  | 3x 121 steam  | 3M 1872v+      | FFP2     | sample 2  | 6-4-2020  | 3x used             | 85,0 | 94,3 | 97,6 | 99,5  | 94,1                                               |                                                                 |                                                              |                                         |         |
| 322                                                                                     | Uni Hospital     | 121 steam     | 3M 1861+       | FFP1     | sample 1  | 22-3-2020 | new                 | NP   | 94,0 | NP   | 97,6  | 95,8                                               |                                                                 |                                                              |                                         |         |
| 323                                                                                     | Uni Hospital     | 121 steam     | 3M 1861+       | FFP1     | sample 2  | 22-3-2020 | new                 | NP   | 89,4 | NP   | 96,8  | 93,1                                               |                                                                 |                                                              |                                         |         |
| 324                                                                                     | Uni Hospital     | 121 steam     | 3M 1861+       | FFP1     | sample 3  | 22-3-2020 | new                 | NP   | 87,3 | NP   | 98,1  | 92,7                                               |                                                                 |                                                              |                                         |         |
| 325                                                                                     | Uni Hospital     | 121 steam     | 3M 1861+       | FFP1     | sample 4  | 22-3-2020 | new                 | NP   | 95,7 | NP   | 97,9  | 96,8                                               |                                                                 |                                                              |                                         |         |
| 328                                                                                     | Uni Hospital     | 3x 121 steam  | 3M 1861+       | FFP1     | sample 1  | 22-3-2020 | new                 | NP   | 94,0 | NP   | 97,6  | 95,8                                               |                                                                 |                                                              |                                         |         |
| 329                                                                                     | Uni Hospital     | 3x 121 steam  | 3M 1861+       | FFP1     | sample 2  | 22-3-2020 | new                 | NP   | 89,4 | NP   | 96,8  | 93,1                                               |                                                                 |                                                              |                                         |         |
| 330                                                                                     | Uni Hospital     | 3x 121 steam  | 3M 1861+       | FFP1     | sample 3  | 22-3-2020 | new                 | NP   | 87,3 | NP   | 98,1  | 92,7                                               |                                                                 |                                                              |                                         |         |
| 331                                                                                     | Uni Hospital     | 3x 121 steam  | 3M 1861+       | FFP1     | sample 4  | 22-3-2020 | new                 | NP   | 95,7 | NP   | 97,9  | 96,8                                               |                                                                 |                                                              |                                         |         |
| 332                                                                                     | Uni Hospital     | 3x 121 steam  | 3M 1861+       | FFP1     | sample 1  | 22-3-2020 | new                 | NP   | 98,8 | NP   | 98,2  | 98,5                                               |                                                                 |                                                              |                                         |         |
| 14                                                                                      | Uni Hospital     | 121 steam     | BM Aura 1862+  | FFP2     | sample 1a | 24-3-2020 | new                 | 92,2 | 97,2 | 99,3 | 100,0 | 97,2                                               |                                                                 |                                                              |                                         |         |
| 15                                                                                      | Uni Hospital     | 121 steam     | BM Aura 1862+  | FFP2     | sample 1b | 24-3-2020 | new                 | 92,3 | 97,3 | 99,4 | 99,9  | 97,2                                               |                                                                 |                                                              |                                         |         |
| 16                                                                                      | Uni Hospital     | 121 steam     | BM Aura 1862+  | FFP2     | sample 2a | 24-3-2020 | new                 | 94,0 | 98,0 | 99,6 | 100,0 | 97,9                                               |                                                                 |                                                              |                                         |         |
| 17                                                                                      | Uni Hospital     | 121 steam     | BM Aura 1862+  | FFP2     | sample 2b | 24-3-2020 | new                 | 94,0 | 97,9 | 99,5 | 100,0 | 97,9                                               |                                                                 |                                                              |                                         |         |
| 36                                                                                      | Uni Hospital     | 121 steam     | BM Aura 1862+  | FFP2     | sample 1  | 25-3-2020 | 1xused              | 87,3 | 94,2 | 97,4 | 100,0 | 94,7                                               |                                                                 |                                                              |                                         |         |
| 37                                                                                      | Uni Hospital     | 121 steam     | BM Aura 1862+  | FFP2     | sample 2  | 25-3-2020 | 1xused              | 89,0 | 94,9 | 97,7 | 100,0 | 95,4                                               |                                                                 |                                                              |                                         |         |
| 38                                                                                      | Uni Hospital     | 121 steam     | BM Aura 1862+  | FFP2     | sample 1  | 25-3-2020 | 1xused              | 86,0 | 93,1 | 99,7 | 100,0 | 94,7                                               |                                                                 |                                                              |                                         |         |
| 39                                                                                      | Uni Hospital     | 121 steam     | BM Aura 1862+  | FFP2     | sample 2  | 25-3-2020 | 1xused              | 87,7 | 93,9 | 97,2 | 100,0 | 94,7                                               |                                                                 |                                                              |                                         |         |
| 40                                                                                      | Uni Hospital     | 121 steam     | BM Aura 1862+  | FFP2     | sample 1  | 25-3-2020 | 1xused              | 86,0 | 93,1 | 99,7 | 100,0 | 94,7                                               |                                                                 |                                                              |                                         |         |
| 41                                                                                      | Uni Hospital     | 121 steam     | BM Aura 1862+  | FFP2     | sample 2  | 25-3-2020 | 1xused              | 87,7 | 93,9 | 97,2 | 100,0 | 94,7                                               |                                                                 |                                                              |                                         |         |
| 42                                                                                      | Uni Hospital     | 121 steam     | BM Aura 1862+  | FFP2     | sample 1  | 25-3-2020 | 1xused              | 89,3 | 94,8 | 97,8 | 100,0 | 95,5                                               |                                                                 |                                                              |                                         |         |
| 43                                                                                      | Uni Hospital     | 121 steam     | BM Aura 1862+  | FFP2     | sample 2  | 25-3-2020 | 1xused              | 89,7 | 95,1 | 97,9 | 100,0 | 95,7                                               |                                                                 |                                                              |                                         |         |
| 44                                                                                      | Uni Hospital     | 121 steam     | BM Aura 1862+  | FFP2     | sample 2  | 25-3-2020 | 1xused              | 87,7 | 93,9 | 97,2 | 100,0 | 94,7                                               |                                                                 |                                                              |                                         |         |
| 45                                                                                      | Uni Hospital     | 121 steam     | BM Aura 1862+  | FFP2     | sample 1  | 25-3-2020 | 1xused              | 86,0 | 93,1 | 99,7 | 100,0 | 94,7                                               |                                                                 |                                                              |                                         |         |
| 46                                                                                      | Uni Hospital     | 121 steam     | BM Aura 1862+  | FFP2     | sample 2  | 25-3-2020 | 1xused              | 87,7 | 93,9 | 97,2 | 100,0 | 94,7                                               |                                                                 |                                                              |                                         |         |
| 47                                                                                      | Uni Hospital     | 121 steam     | BM Aura 1862+  | FFP2     | sample 1  | 25-3-2020 | 1xused              | 89,3 | 94,8 | 97,8 | 100,0 | 95,5                                               |                                                                 |                                                              |                                         |         |
| 48                                                                                      | Uni Hospital     | 121 steam     | BM Aura 1862+  | FFP2     | sample 2  | 25-3-2020 | 1xused              | 89,7 | 95,1 | 97,9 | 100,0 | 95,7                                               |                                                                 |                                                              |                                         |         |
| 49                                                                                      | independent CSA  | 121 steam     | BM Aura 1862+  | FFP2     | sample 1  | 1-4-2020  | 1xused              | 97,6 | 99,3 | 99,7 | 99,9  | 99,1                                               |                                                                 |                                                              |                                         |         |
| 50                                                                                      | independent CSA  | 2x 121 steam  | BM Aura 1862+  | FFP2     | sample 1  | 2-4-2020  | 2xused              | 97,5 | 99,3 | 99,6 | 100,0 | 99,1                                               |                                                                 |                                                              |                                         |         |
| 51                                                                                      | independent CSA  | 3x 121 steam  | BM Aura 1862+  | FFP2     | sample 1  | 3-4-2020  | 3xused              | 93,6 | 98,0 | 99,1 | 99,8  | 97,6                                               |                                                                 |                                                              |                                         |         |
| 80                                                                                      | Uni Hospital     | 122 steam     | BM Aura 1862+  | FFP2     | sample 1  | 27-3-2020 | new                 | 99,2 | 99,8 | 99,9 | 100,0 | 99,7                                               |                                                                 |                                                              |                                         |         |
| 81                                                                                      | Uni Hospital     | 2x 121 steam  | BM Aura 1862+  | FFP2     | sample 1  | 27-3-2020 | new                 | 95,2 | 98,6 | 99,5 | 100,0 | 98,3                                               |                                                                 |                                                              |                                         |         |
| 127                                                                                     | Uni Hospital     | H2O2 sterrad  | barrier        | FFP2     | sample 1a | 1-4-2020  | used                | 84,6 | 94,7 | 97,8 | 99,6  | 94,2                                               |                                                                 |                                                              |                                         |         |
| 128                                                                                     | Uni Hospital     | H2O2 sterrad  | barrier        | FFP2     | sample 1b | 1-4-2020  | used                | 86,0 | 95,2 | 98,2 | 100,0 | 94,8                                               |                                                                 |                                                              |                                         |         |
| 129                                                                                     | Uni Hospital     | H2O2 sterrad  | barrier        | FFP2     | sample 2a | 1-4-2020  | used                | 80,6 | 93,1 | 97,6 | 100,0 | 92,8                                               |                                                                 |                                                              |                                         |         |
| 130                                                                                     | Uni Hospital     | H2O2 sterrad  | barrier        | FFP2     | sample 2b | 1-4-2020  | used                | 80,8 | 93,3 | 97,6 | 100,0 | 92,9                                               |                                                                 |                                                              |                                         |         |
| 131                                                                                     | Uni Hospital     | H2O2 sterrad  | barrier        | FFP2     | sample 1a | 1-4-2020  | used                | 82,3 | 93,6 | 97,4 | 100,0 | 93,3                                               |                                                                 |                                                              |                                         |         |
| 132                                                                                     | Uni Hospital     | H2O2 sterrad  | barrier        | FFP2     | sample 1b | 1-4-2020  | used                | 87,2 | 96,0 | 98,5 | 99,9  | 95,4                                               |                                                                 |                                                              |                                         |         |
| 133                                                                                     | Uni Hospital     | H2O2 sterrad  | barrier        | FFP2     | sample 2a | 1-4-2020  | used                | 81,9 | 93,5 | 97,3 | 99,5  | 93,0                                               |                                                                 |                                                              |                                         |         |
| 134                                                                                     | Uni Hospital     | H2O2 sterrad  | barrier        | FFP2     | sample 2b | 1-4-2020  | used                | 74,9 | 89,8 | 95,5 | 100,0 | 90,0                                               |                                                                 |                                                              |                                         |         |
| 30                                                                                      | independent CSA  | 121 steam     | Hakyard Health | FFP1     | sample 1  | 24-3-2020 | used                | 86,8 | 95,9 | 99,3 | 100,0 | 95,5                                               |                                                                 |                                                              |                                         |         |
| 31                                                                                      | independent CSA  | 121 steam     | Hakyard Health | FFP1     | sample 2  | 24-3-2020 | used                | 89,4 | 96,9 | 99,5 | 100,0 | 96,5                                               |                                                                 |                                                              |                                         |         |
| 75                                                                                      | independent CSA  | 121 steam     | Hakyard Health | FFP1     | sample 1  | 26-3-2020 | new                 | 80,3 | 95,8 | 99,5 | 100,0 | 93,9                                               |                                                                 |                                                              |                                         |         |
| 195                                                                                     | hospital         | H2O2 sterrad  | Health FFP2 NR | FFP2     | sample 1a | 3-4-2020  | new                 | 60   | 85   | 95   | 100   | 85,1                                               |                                                                 |                                                              |                                         |         |
| 196                                                                                     | hospital         | H2O2 sterrad  | Health FFP2 NR | FFP2     | sample 1b | 3-4-2020  | new                 | 64   | 88   | 96   | 100   | 86,8                                               |                                                                 |                                                              |                                         |         |
| 197                                                                                     | hospital         | H2O2 sterrad  | Health FFP2 NR | FFP2     | sample 2a | 3-4-2020  | new                 | 93   | 98   | 99   | 100   | 97,5                                               |                                                                 |                                                              |                                         |         |
| 198                                                                                     | hospital         | H2O2 sterrad  | Health FFP2 NR | FFP2     | sample 2b | 3-4-2020  | new                 | 81   | 94   | 98   | 100   | 93,2                                               |                                                                 |                                                              |                                         |         |
| 78                                                                                      | Uni Hospital     | H2O2 sterrad  | i OP-Air M510  | FFP2     | sample 1  | 27-3-2020 | new                 | 90,7 | 97,2 | 99,0 | 99,2  | 96,5                                               |                                                                 |                                                              |                                         |         |
| 79                                                                                      | Uni Hospital     | H2O2 sterrad  | i OP-Air M510  | FFP2     | sample 2  | 27-3-2020 | new                 | 89,9 | 99,7 | 98,6 | 99,2  | 96,8                                               |                                                                 |                                                              |                                         |         |
|                                                                                         |                  |               |                |          |           |           |                     |      |      |      |       |                                                    | 97,5                                                            | 99                                                           | 1,5                                     |         |
|                                                                                         |                  |               |                |          |           |           |                     |      |      |      |       |                                                    | 92,0                                                            | 99                                                           | 7,0                                     |         |
|                                                                                         |                  |               |                |          |           |           |                     |      |      |      |       |                                                    | 94,6                                                            | 94                                                           | 0,6                                     |         |
|                                                                                         |                  |               |                |          |           |           |                     |      |      |      |       |                                                    | 95,4                                                            | 88                                                           | 95                                      | 3,9     |
|                                                                                         |                  |               |                |          |           |           |                     |      |      |      |       |                                                    | 95,8                                                            | 98                                                           | 98                                      | 2,7     |
|                                                                                         |                  |               |                |          |           |           |                     |      |      |      |       |                                                    | 99,1                                                            | 97                                                           | 2,1                                     |         |
|                                                                                         |                  |               |                |          |           |           |                     |      |      |      |       |                                                    | 97,6                                                            | 98                                                           | 0,4                                     |         |
|                                                                                         |                  |               |                |          |           |           |                     |      |      |      |       |                                                    | 98,3                                                            | 99                                                           | 0,7                                     |         |
|                                                                                         |                  |               |                |          |           |           |                     |      |      |      |       |                                                    | 97,3                                                            | 97                                                           | 98                                      | 4,2     |
|                                                                                         |                  |               |                |          |           |           |                     |      |      |      |       |                                                    | 95,3                                                            | 97                                                           | 98                                      | 2,2     |
|                                                                                         |                  |               |                |          |           |           |                     |      |      |      |       |                                                    | 90,7                                                            | 91                                                           | 91                                      | 0,3     |
|                                                                                         |                  |               |                |          |           |           |                     |      |      |      |       |                                                    | 96,7                                                            | 95                                                           | 95                                      | 1,7     |
