# Supplementary material for: Can sterilization of disposable face masks be an alternative for imported face masks? A nationwide field study including 19 sterilization departments and 471 imported brand types during COVID-19 shortages
Source: PubMed Central journal article supplement (PMC8439445; doi:10.1371/journal.pone.0257468), 2021-09-14
Supplement: pone.0257468.s004.pdf [file pone.0257468.s004.pdf]

| ID  | client type     | sterilisation | Brand name               | Grade         | sample number | date   | status   | percentage 0.3mu<br>particles filtered [%] | percentage 0.5mu<br>particles filtered [%] | percentage 1mu<br>particles filtered [%] | percentage 5mu<br>particles filtered [%] |
|-----|-----------------|---------------|--------------------------|---------------|---------------|--------|----------|--------------------------------------------|--------------------------------------------|------------------------------------------|------------------------------------------|
| 163 | independent CSA | 121 steam     | KN95 CE FFP2 GB2626-2006 | FFP2          | 43927         | used   | 7,905595 | 16,41173904                                | 30,56385421                                | 97,09208401                              | 37,99331815                              |
| 162 | independent CSA | 121 steam     | KN95 CE FFP2 GB2626-2006 | FFP2          | 43927         | used   | 16,41529 | 34,81234999                                | 55,2768955                                 | 99,6365105                               | 51,53526196                              |
| 1   | independent CSA | 121 steam     | pools masker MB20 NRD    | FFP2          | 43914         | used   | 83,43675 | 94,68837861                                | 98,25421007                                | 98,45389288                              | 93,70830863                              |
| 2   | independent CSA | 121 steam     | pools masker MB20 NRD    | FFP2          | 43914         | used   | 83,29217 | 94,6200933                                 | 98,14441196                                | 99,77912755                              | 93,95895069                              |
| 3   | independent CSA | 121 steam     | pools masker MB20 NRD    | FFP2          | 43914         | used   | 83,56057 | 94,70649512                                | 98,3859678                                 | 99,77912755                              | 94,10804096                              |
| 4   | independent CSA | 121 steam     | pools masker MB20 NRD    | FFP2          | 43914         | used   | 67,35721 | 84,44627932                                | 94,02423793                                | 98,12258421                              | 85,9875781                               |
| 5   | independent CSA | 121 steam     | pools masker MB20 NRD    | FFP2          | 43914         | used   | 69,22748 | 85,12146772                                | 94,20540481                                | 99,22694644                              | 86,94532429                              |
| 6   | independent CSA | 121 steam     | pools masker MB20 NRD    | FFP2          | 43914         | used   | 67,37659 | 84,71872376                                | 93,89797011                                | 95,6929873                               | 85,42156762                              |
| 7   | independent CSA | 121 steam     | Green Klinion            | FFP2          | 43914         | used   | 43,4946  | 69,670175                                  | 88,5864866                                 | 99,55825511                              | 75,3273788                               |
| 8   | independent CSA | 121 steam     | Green Klinion            | FFP2          | 43914         | used   | 51,26509 | 74,81944459                                | 90,86479735                                | 100                                      | 79,23733186                              |
| 9   | independent CSA | 121 steam     | white                    | surgical mask | 43914         | used   | 69,04653 | 85,74788089                                | 95,27868132                                | 99,88956378                              | 87,49066381                              |
| 10  | independent CSA | 121 steam     | white                    | surgical mask | 43914         | used   | 69,88408 | 85,64057541                                | 95,20731255                                | 99,88956378                              | 87,65538263                              |
| 11  | independent CSA | 121 steam     | IMG europe green         | FFP2          | 43914         | used   | 68,85753 | 86,73314032                                | 96,13510657                                | 100                                      | 87,93144345                              |
| 12  | independent CSA | 121 steam     | IMG europe green         | FFP2          | 43914         | used   | 68,96021 | 86,75474078                                | 96,12412676                                | 100                                      | 87,95976887                              |
| 13  | independent CSA | 121 steam     | IMG europe green         | FFP2          | 43914         | used   | 62,56747 | 85,33906442                                | 95,33907028                                | 99,88956378                              | 85,29668818                              |
| 14  | Uni Hospital    | 121 steam     | 3M Aura 1862+            | FFP2          | 43914         | new    | 92,24512 | 97,1508304                                 | 99,32474163                                | 100                                      | 97,18017216                              |
| 15  | Uni Hospital    | 121 steam     | 3M Aura 1862+            | FFP2          | 43914         | new    | 92,29054 | 97,27903955                                | 99,36591592                                | 99,88956378                              | 97,20626547                              |
| 16  | Uni Hospital    | 121 steam     | 3M Aura 1862+            | FFP2          | 43914         | new    | 94,04618 | 97,98000913                                | 99,56904242                                | 100                                      | 97,89880672                              |
| 17  | Uni Hospital    | 121 steam     | 3M Aura 1862+            | FFP2          | 43914         | new    | 93,96086 | 97,93541464                                | 99,53335804                                | 100                                      | 97,85740818                              |
| 18  | independent CSA | 121 steam     | B701                     | FFP2          | 43914         | used   | 45,38185 | 90,29110224                                | 97,15781919                                | 100                                      | 76,70769375                              |
| 19  | independent CSA | 121 steam     | B702                     | FFP2          | 43914         | used   | 46,60219 | 73,2314628                                 | 91,27379531                                | 100                                      | 77,77686189                              |
| 20  | independent CSA | 121 steam     | Msafe                    | FFP2          | 43914         | used   | 89,37372 | 95,19355052                                | 98,34753846                                | 99,88956378                              | 95,70109217                              |
| 21  | independent CSA | 121 steam     | Msafe                    | FFP2          | 43914         | used   | 88,64665 | 94,55529194                                | 97,98245975                                | 99,88956378                              | 95,26849097                              |
| 22  | independent CSA | 121 steam     | My-T-Gear 301            | FFP1          | 43914         | used   | 88,13073 | 94,24173696                                | 97,63659571                                | 99,88956378                              | 94,9746566                               |
| 23  | independent CSA | 121 steam     | My-T-Gear 301            | FFP1          | 43914         | used   | 85,61997 | 92,78684184                                | 97,05192078                                | 99,88956378                              | 93,8370738                               |
| 26  | independent CSA | 121 steam     | Medicom surgical mask    | IIR           | 43914         | used   | 50,55501 | 77,49232661                                | 93,66739408                                | 100                                      | 80,42868156                              |
| 27  | independent CSA | 121 steam     | Medicom surgical mask    | IIR           | 43914         | used   | 50,55501 | 77,38571792                                | 93,34623461                                | 100                                      | 80,32173952                              |
| 28  | independent CSA | 121 steam     | Medicom surgical mask    | IIR           | 43914         | used   | 52,1244  | 78,31662782                                | 93,5905354                                 | 99,77912755                              | 80,95267377                              |
| 29  | independent CSA | 121 steam     | Medicom surgical mask    | IIR           | 43914         | used   | 51,07814 | 77,73155745                                | 93,53472136                                | 99,92637585                              | 80,56769828                              |
| 30  | independent CSA | 121 steam     | Hakyard Health           | FFP1          | 43914         | used   | 86,82747 | 95,89591368                                | 99,31101687                                | 100                                      | 95,50860005                              |
| 31  | independent CSA | 121 steam     | Hakyard Health           | FFP1          | 43914         | used   | 89,41121 | 96,94318732                                | 99,48120394                                | 100                                      | 96,45890141                              |
| 34  | Uni Hospital    | 134 steam     | 3M 1861+                 | FFP1          | 43915         | new    | 77,7     | 88,70225071                                | 93,94337482                                | 100                                      | 90,08640638                              |
| 35  | Uni Hospital    | 134 steam     | 3M 1861+                 | FFP1          | 43915         | new    | 78,36055 | 88,72856248                                | 93,81029967                                | 100                                      | 90,22485186                              |
| 36  | Uni Hospital    | 121 steam     | 3M Aura 1862+            | FFP2          | 43915         | 1xused | 87,29014 | 94,18509806                                | 97,37603112                                | 100                                      | 94,71281831                              |
| 37  | Uni Hospital    | 121 steam     | 3M Aura 1862+            | FFP2          | 43915         | 1xused | 88,9877  | 94,89867336                                | 97,70018852                                | 100                                      | 95,39664156                              |
| 38  | Uni Hospital    | 121 steam     | 3M Aura 1862+            | FFP2          | 43915         | 1xused | 85,9859  | 93,14630925                                | 99,69972788                                | 100                                      | 94,70798474                              |
| 39  | Uni Hospital    | 121 steam     | 3M Aura 1862+            | FFP2          | 43915         | 1xused | 87,72289 | 93,93513622                                | 97,23613161                                | 100                                      | 94,72353937                              |
| 40  | Uni Hospital    | 121 steam     | 3M Aura 1862+            | FFP2          | 43915         | 1xused | 85,9859  | 93,14630925                                | 99,69972788                                | 100                                      | 94,70798474                              |
| 41  | Uni Hospital    | 121 steam     | 3M Aura 1862+            | FFP2          | 43915         | 1xused | 87,72289 | 93,93513622                                | 97,23613161                                | 100                                      | 94,72353937                              |
| 42  | Uni Hospital    | 121 steam     | 3M Aura 1862+            | FFP2          | 43915         | 1xused | 89,29094 | 94,79079509                                | 97,83667585                                | 100                                      | 95,47960263                              |
| 43  | Uni Hospital    | 121 steam     | 3M Aura 1862+            | FFP2          | 43915         | 1xused | 89,72099 | 95,06022765                                | 97,88103423                                | 100                                      | 95,66556223                              |
| 44  | Uni Hospital    | 121 steam     | 3M Aura 1862+            | FFP2          | 43915         | 1xused | 87,72289 | 93,93513622                                | 97,23613161                                | 100                                      | 94,72353937                              |
| 45  | Uni Hospital    | 121 steam     | 3M Aura 1862+            | FFP2          | 43915         | 1xused | 85,9859  | 93,14630925                                | 99,69972788                                | 100                                      | 94,70798474                              |
| 46  | Uni Hospital    | 121 steam     | 3M Aura 1862+            | FFP2          | 43915         | 1xused | 87,72289 | 93,93513622                                | 97,23613161                                | 100                                      | 94,72353937                              |
| 47  | Uni Hospital    | 121 steam     | 3M Aura 1862+            | FFP2          | 43915         | 1xused | 89,29094 | 94,79079509                                | 97,83667585                                | 100                                      | 95,47960263                              |
| 48  | Uni Hospital    | 121 steam     | 3M Aura 1862+            | FFP2          | 43915         | 1xused | 89,72099 | 95,06022765                                | 97,88103423                                | 100                                      | 95,66556223                              |
| 49  | independent CSA | 121 steam     | 3M Aura 1862+            | FFP2          | 43922         | 1xused | 97,62808 | 99,28695094                                | 99,72020098                                | 99,88655701                              | 99,13044742                              |
| 50  | independent CSA | 2x 121 steam  | 3M Aura 1862+            | FFP2          | 43923         | 2xused | 97,463   | 99,26827388                                | 99,64389729                                | 100                                      | 99,09379232                              |
| 51  | independent CSA | 3x 121 steam  | 3M Aura 1862+            | FFP2          | 43924         | 3xused | 93,58645 | 97,96065197                                | 99,09963579                                | 99,79541735                              | 97,61035947                              |
| 52  | independent CSA | 4x 121 steam  | 3M Aura 1862+            | FFP2          | 43927         | 4xused | 89,88798 | 96,69684281                                | 98,85592819                                | 99,38625205                              | 96,20675171                              |
| 53  | independent CSA | 121 steam     | 3M 1872v+                | FFP2          | 43915         | used   | 97,24651 | 94,79079509                                | 97,83667585                                | 100                                      | 97,4684959                               |
| 54  | independent CSA | 121 steam     | 3M 1872v+                | FFP2          | 43915         | used   | 93,16546 | 97,01992854                                | 98,93539884                                | 100                                      | 97,28019617                              |
| 55  | independent CSA | 121 steam     | kolmi OP-Air M51010 BL   | FFP2          | 43915         | new    | 10,3785  | 63,92813728                                | 85,4982214                                 | 99,88655701                              | 64,92285285                              |
| 56  | independent CSA | 121 steam     | kolmi OP-Air M51010 BL   | FFP2          | 43915         | new    | 8,018239 | 61,7726768                                 | 84,79531166                                | 99,88655701                              | 63,61819621                              |
| 57  | independent CSA | 121 steam     | kolmi OP-Air M51010 BL   | FFP2          | 43915         | new    | 25,85959 | 61,04173574                                | 81,87789502                                | 99,88655701                              | 67,16644555                              |
| 58  | independent CSA | 121 steam     | kolmi OP-Air M51010 BL   | FFP2          | 43915         | new    | 21,93738 | 56,41875714                                | 78,80351796                                | 100                                      | 64,28991395                              |
| 59  | independent CSA | 121 steam     | kolmi OP-Air M51010 BL   | FFP2          | 43915         | new    | 23,58228 | 59,24779902                                | 79,75892926                                | 100                                      | 65,64725304                              |
| 60  | independent CSA | 121 steam     | kolmi OP-Air M51010 BL   | FFP2          | 43915         | new    | 20,77988 | 61,05594409                                | 82,30100574                                | 100                                      | 66,03420797                              |
| 61  | independent CSA | 121 steam     | kolmi OP-Air M51010 BL   | FFP2          | 43915         | new    | 25,03875 | 63,20351104                                | 83,24618049                                | 100                                      | 67,87211114                              |
| 62  | independent CSA | 121 steam     | kolmi OP-Air M52010S WH  | FFP2          | 43915         | new    | 23,68812 | 60,52444627                                | 81,48890614                                | 100                                      | 66,42536818                              |
| 63  | independent CSA | 121 steam     | kolmi OP-Air M52010S WH  | FFP2          | 43915         | new    | 24,688   | 61,75110115                                | 81,84377319                                | 99,88655701                              | 67,04235668                              |
| 64  | independent CSA | 121 steam     | SD1069                   | FFP2          | 43916         | new    | 67,19078 | 88,07619777                                | 95,83666175                                | 99,5908347                               | 87,67361763                              |
| 65  | independent CSA | 121 steam     | SD1069                   | FFP2          | 43916         | new    | 67,57676 | 88,1421919                                 | 95,96190038                                | 99,79541735                              | 87,869067                                |
| 66  | independent CSA | 121 steam     | RG 200425                | FFP2          | 43916         | new    | 60,90982 | 98,39561342                                | 92,81181244                                | 100                                      | 88,0293113                               |
| 67  | independent CSA | 121 steam     | RG 200426                | FFP2          | 43916         | new    | 64,0481  | 85,87070217                                | 93,30018187                                | 100                                      | 85,80474624                              |
| 68  | independent CSA | 121 steam     | RG 200427                | FFP2          | 43916         | new    | 77,31093 | 88,69837265                                | 93,20024409                                | 99,53198128                              | 99,68538322                              |
| 69  | independent CSA | 121 steam     | RG 200428                | FFP2          | 43916         | new    | 67,75758 | 84,33761612                                | 92,04951617                                | 99,06396256                              | 85,80216961                              |
| 70  | independent CSA | 134 steam     | 3M 1861+                 | FFP1          | 43916         | new    | 77,65753 | 92,0063798                                 | 96,17952664                                | 100                                      | 91,46085991                              |
| 71  | independent CSA | 134 steam     | 3M 1861+                 | FFP2          | 43916         | new    | 61,27301 | 84,23674454                                | 92,2980071                                 | 100                                      | 84,45194014                              |
| 72  | independent CSA | 134 steam     | 3M 1861+                 | FFP2          | 43916         | new    | 75,60598 | 91,70941099                                | 96,30670618                                | 99,88144635                              | 90,87588474                              |
| 73  | independent CSA | 121 steam     | RG 209220                | FFP2          | 43916         | new    | 58,23328 | 88,19548979                                | 96,08795737                                | 99,88144635                              | 85,59954214                              |
| 74  | independent CSA | 121 steam     | RG 209220                | FFP2          | 43916         | new    | 57,52112 | 87,73808232                                | 96,13882919                                | 99,88144635                              | 85,31986949                              |
| 75  | independent CSA | 121 steam     | Hakyard Health           | FFP1          | 43916         | new    | 80,25712 | 95,82484122                                | 99,47845898                                | 100                                      | 93,89010537                              |
| 76  | independent CSA | 122 steam     | surgical mask white      | I             | 43916         | new    | 23,15598 | 61,92257979                                | 92,08630131                                | 99,77912755                              | 69,23599662                              |
| 77  | independent CSA | 122 steam     | surgical mask white      | I             | 43916         | new    | 21,13725 | 59,37093903                                | 91,43025761                                | 99,77912755                              | 67,9293923                               |
| 78  | Uni Hospital    | H2O2 sterrad  | kolmi OP-Air M51010 BL   | FFP2          | 43917         | new    | 90,72331 | 97,24895056                                | 98,99809096                                | 99,18166939                              | 96,5380051                               |
| 79  | Uni Hospital    | H2O2 sterrad  | kolmi OP-Air M51010 BL   | FFP2          | 43917         | new    | 89,85145 | 98,63929921                                | 98,63929921                                | 99,18166939                              | 96,83528725                              |
| 80  | Uni Hospital    | 122 steam     | 3M Aura 1862+            | FFP2          | 43917         | new    | 99,15371 | 99,7955476                                 | 99,93230344                                | 100                                      | 99,72039094                              |
| 81  | Uni Hospital    | 2x 121 steam  | 3M Aura 1862+            | FFP2          | 43917         | new    | 95,1734  | 98,61800527                                | 99,47873651                                | 100                                      | 98,31753473                              |
| 82  | Uni Hospital    | 3x 121 steam  | 3M Aura 1862+            | FFP2          | 43917         | new    | 93,66717 | 98,0581335                                 | 99,21471994                                | 99,79541735                              | 97,68386024                              |
| 83  | Uni Hospital    | 121 steam     | 3M Aura 1862+            | FFP2          | 43917         | new    | 93,6724  | 98,12197096                                | 99,3433434                                 | 100                                      | 97,78442905                              |
| 84  | Uni Hospital    | 121 steam     | 3M Aura 1862+            | FFP2          | 43917         | new    | 91,27413 | 97,28949598                                | 98,92362474                                | 97,74959083                              | 96,30921068                              |
| 85  | Uni Hospital    | 121 steam     | 3M Aura 1862+            | FFP2          | 43917         | new    | 95,28102 | 98,83971104                                | 99,66151722                                | 100                                      | 98,44556215                              |
| 86  | Uni Hospital    | 121 steam     | 3M Aura 1862+            | FFP2          | 43917         | new    | 97,59824 | 99,46514561                                | 99,83075861                                | 100                                      | 99,22353643                              |
| 87  | Uni Hospital    | 121 steam     | 3M Aura 1862+            | FFP2          | 43917         | new    | 93,66684 | 98,24533253                                | 99,45165789                                | 100                                      | 97,84095711                              |
| 88  | Uni Hospital    | 121 steam     | 3M 1862+                 | FFP2          | 43917         | new    | 93,26931 | 98,1262843                                 | 99,47873651                                | 99,79541735                              | 97,66743779                              |
| 89  | Uni Hospital    | 121 steam     | 3M 1872v+                | FFP2          | 43917         | new    | 95,57076 | 98,78450026                                | 99,50581513                                | 98,77250409                              | 98,15839388                              |
| 90  | Uni Hospital    | 121 steam     | 3M 1872v+                | FFP2          | 43917         | new    | 97,78392 | 99,52294439                                | 99,8781462                                 |                                          |                                          |

|     |                 |                 |                                          |      |               |            |             |             |             |             |
|-----|-----------------|-----------------|------------------------------------------|------|---------------|------------|-------------|-------------|-------------|-------------|
| 137 | hospital        | 3x 121 steam    | 3M 1872v+                                | FFP2 | 43922 1xused  | 97,49408   | 99,12010308 | 99,66997575 | 99,39698492 | 98,92028503 |
| 138 | hospital        | 3x 121 steam    | 3M 1872v+                                | FFP2 | 43922 1xused  | 94,41248   | 96,42080829 | 99,6182852  | 96,68341709 | 96,78374785 |
| 139 | hospital        | 5x 121 steam    | 3M 1872v+                                | FFP2 | 43922 1xused  | 96,7359429 | 97,74947315 | 97,39698492 | 96,87149444 | 96,87149444 |
| 140 | hospital        | 5x 121 steam    | 3M 1872v+                                | FFP2 | 43922 1xused  | 97,1416    | 99,0207532  | 99,58249944 | 100         | 98,93154286 |
| 141 | hospital        | 121 steam       | 2R surgical mask with elastics blaauw 2R | FFP2 | 43923 new     | 54,87392   | 72,97546829 | 85,19841111 | 99,52531646 | 78,14327899 |
| 142 | hospital        | 121 steam       | 2R surgical mask with elastics blaauw 2R | FFP2 | 43923 new     | 54,32915   | 72,65548943 | 84,85334831 | 100         | 77,95949809 |
| 143 | hospital        | 121 steam       | 2R surgical mask with elastics blaauw 2R | FFP2 | 43923 new     | 49,39129   | 71,2097211  | 84,66075513 | 100         | 76,31544071 |
| 144 | hospital        | H2O2 sterrad    | 2R surgical mask with elastics blaauw 2R | FFP2 | 43923 new     | 68,02766   | 82,90877345 | 91,35336837 | 100         | 85,57244921 |
| 145 | hospital        | H2O2 sterrad    | 2R surgical mask with elastics blaauw 2R | FFP2 | 43923 new     | 68,44152   | 83,51187496 | 91,43762789 | 100         | 85,84775572 |
| 146 | hospital        | 3x H2O2 sterrad | 2R surgical mask with elastics blaauw 2R | FFP2 | 43923 new     | 67,09528   | 82,4212664  | 91,62219636 | 100         | 85,28468644 |
| 146 | hospital        | 3x H2O2 sterrad | 2R surgical mask with elastics blaauw 2R | FFP2 | 43923 new     | 67,09528   | 82,4212664  | 91,62219636 | 100         | 85,28468644 |
| 147 | hospital        | 3x H2O2 sterrad | 2R surgical mask with elastics blaauw 2R | FFP2 | 43923 new     | 44,34123   | 65,68240749 | 81,0375958  | 99,76265823 | 72,70597343 |
| 147 | hospital        | 3x H2O2 sterrad | 2R surgical mask with elastics blaauw 2R | FFP2 | 43923 new     | 44,34123   | 65,68240749 | 81,0375958  | 99,76265823 | 72,70597343 |
| 148 | hospital        | 5x H2O2 sterrad | 2R surgical mask with elastics blaauw 2R | FFP2 | 43923 new     | 58,3366    | 76,88836852 | 88,07527184 | 99,76265823 | 80,89072442 |
| 149 | hospital        | 5x H2O2 sterrad | 2R surgical mask with elastics blaauw 2R | FFP2 | 43923 new     | 49,40696   | 68,94864889 | 82,97556474 | 98,81329114 | 75,03611702 |
| 150 | hospital        | H2O2 sterrad    | Medline surgical mask                    | 2R   | 43923 new     | 42,79271   | 81,25481386 | 90,01843816 | 100         | 78,51648946 |
| 151 | hospital        | H2O2 sterrad    | Medline surgical mask                    | 2R   | 43923 new     | 42,39038   | 65,43224487 | 81,62976724 | 100         | 72,36309918 |
| 152 | hospital        | H2O2 sterrad    | Medline surgical mask                    | 2R   | 43923 new     | 41,88002   | 64,34611682 | 80,41534388 | 99,75609756 | 71,59939537 |
| 153 | hospital        | 121 steam       | 3M 1862+                                 | FFP2 | 43923 new     | 94,93024   | 97,62977375 | 98,51524268 | 84,87804878 | 93,98832599 |
| 154 | hospital        | H2O2 sterrad    | L+D mask                                 | FFP2 | 43923 new     | 12,51552   | 20,83660944 | 25,32544051 | 83,90243902 | 35,64500119 |
| 155 | hospital        | H2O2 sterrad    | L+D mask                                 | FFP2 | 43923 new     | 8,928992   | 15,26215501 | 17,27364729 | 77,56097561 | 29,75644253 |
| 156 | independent CSA | 3x 121 steam    | 3M Aura 1862+                            | FFP2 | 43927 3x used | 80,57485   | 90,9908357  | 95,64137237 | 98,30371567 | 91,37769347 |
| 157 | independent CSA | 3x 121 steam    | 3M Aura 1862+                            | FFP2 | 43927 3x used | 86,91594   | 97,33010472 | 93,80427667 | 99,75767367 | 94,45199824 |
| 158 | independent CSA | 3x 121 steam    | 3M 1872v+                                | FFP2 | 43927 3x used | 80,04977   | 97,2988206  | 95,79526708 | 86,34146341 | 89,8713299  |
| 159 | independent CSA | 3x 121 steam    | 3M 1872v+                                | FFP2 | 43927 3x used | 84,99568   | 94,30459724 | 97,646015   | 99,51219512 | 94,11462272 |
| 160 | independent CSA | 121 steam       | KN95 CE FFP2 GB2626-2006                 | FFP2 | 43927 used    | 97,97469   | 99,5097098  | 99,7924463  | 100         | 99,31921029 |
| 161 | independent CSA | 121 steam       | KN95 CE FFP2 GB2626-2006                 | FFP2 | 43927 used    | 96,43058   | 99,42133973 | 99,81131482 | 99,75767367 | 98,85522589 |
| 164 | independent CSA | 121 steam       | ASATEX FMP3V                             | FFP3 | 43927 used    | 90,68231   | 94,48505346 | 96,37724457 | 99,75767367 | 95,32557118 |
| 165 | independent CSA | 121 steam       | Msafe 6204                               | FFP2 | 43927 used    | 80,35053   | 88,25987345 | 92,76392339 | 99,6365105  | 90,25271008 |
| 166 | independent CSA | 121 steam       | INXS                                     | FFP2 | 43927 used    | 76,68761   | 86,61029893 | 91,41482437 | 99,75767367 | 88,61760247 |
| 171 | hospital        | 2x 121 steam    | Deltaplus M1200C                         | FFP2 | 43927 new     | 75,15795   | 85,62971852 | 90,93367716 | 100         | 87,93033622 |
| 172 | hospital        | 2x 121 steam    | Deltaplus M1200C                         | FFP2 | 43927 new     | 76,94028   | 86,71568841 | 91,65068084 | 98,9095315  | 88,55404613 |
| 175 | hospital        | 121 steam       | Deltaplus M1200C                         | FFP2 | 43927 new     | 82,35117   | 89,22932577 | 92,98562848 | 100         | 91,14153182 |
| 176 | hospital        | 121 steam       | Deltaplus M1200C                         | FFP2 | 43927 new     | 77,09614   | 87,29696705 | 92,31107896 | 99,6365105  | 89,08517397 |
| 179 | hospital        | 121 steam       | B702C                                    | FFP2 | 43924 used    | 81,48423   | 84,52345625 | 91,63181232 | 100         | 89,40987514 |
| 180 | hospital        | 121 steam       | B702C                                    | FFP2 | 43924 used    | 81,2976    | 87,2288937  | 93,66961225 | 99,87883683 | 90,51873464 |
| 181 | hospital        | 121 steam       | Wilson 9004 FFP2 CE 0194                 | FFP2 | 43923 new     | 51,79991   | 80,78425481 | 94,330286   | 99,47460595 | 81,59726448 |
| 182 | hospital        | 121 steam       | Wilson 9004 FFP2 CE 0194                 | FFP2 | 43923 new     | 44,67488   | 74,480836   | 91,10123291 | 99,6497373  | 77,47667061 |
| 183 | hospital        | 2x 121 steam    | Wilson 9004 FFP2 CE 0194                 | FFP2 | 43923 new     | 45,15907   | 76,08385505 | 92,03554948 | 99,32773109 | 78,1551574  |
| 184 | hospital        | 2x 121 steam    | Wilson 9004 FFP2 CE 0194                 | FFP2 | 43923 new     | 42,19011   | 73,55779721 | 91,3946334  | 100         | 76,78563469 |
| 185 | hospital        | 121 steam       | DFND920VNR CE0 194                       | FFP2 | 43923 new     | 89,94361   | 96,62897721 | 98,97668176 | 99,82876712 | 96,34450788 |
| 186 | hospital        | 121 steam       | DFND920VNR CE0 195                       | FFP2 | 43923 new     | 92,21868   | 97,37629608 | 99,11927529 | 99,82876712 | 97,13575405 |
| 187 | hospital        | H2O2 sterrad    | 3M Aura 1862+                            | FFP2 | 43924 new     | 90,41944   | 95,88656294 | 98,24056005 | 99,41037736 | 95,98923561 |
| 188 | hospital        | H2O2 sterrad    | 3M Aura 1862+                            | FFP2 | 43924 new     | 97,18341   | 99,14262684 | 99,71811789 | 99,64622642 | 98,92259628 |
| 189 | hospital        | H2O2 sterrad    | 3M Aura 1862+                            | FFP2 | 43924 new     | 70,49732   | 85,50485249 | 93,91650697 | 99,7826087  | 87,42532089 |
| 190 | hospital        | H2O2 sterrad    | 3M Aura 1862+                            | FFP2 | 43924 new     | 76,06671   | 89,00849576 | 95,47589524 | 100         | 90,13777628 |
| 191 | hospital        | 2x H2O2 sterrad | 3M Aura 1862+                            | FFP2 | 43924 new     | 39,80362   | 65,18291734 | 82,30968269 | 99,44649446 | 71,68567964 |
| 192 | hospital        | 2x H2O2 sterrad | 3M Aura 1862+                            | FFP2 | 43924 new     | 43,08001   | 68,47398484 | 85,07081574 | 99,07749077 | 73,9255743  |
| 193 | hospital        | 2x H2O2 sterrad | 3M Aura 1862+                            | FFP2 | 43924 new     | 39,98605   | 65,9590675  | 83,30147944 | 99,5923913  | 72,20974652 |
| 194 | hospital        | 2x H2O2 sterrad | 3M Aura 1862+                            | FFP2 | 43924 new     | 42,44686   | 67,94310076 | 84,83046648 | 100         | 73,80510652 |
| 195 | hospital        | H2O2 sterrad    | Halyard Health FFP2 NR CE 0086           | FFP2 | 43924 new     | 59,98669   | 85,17263223 | 95,12475248 | 100         | 85,0710181  |
| 196 | hospital        | H2O2 sterrad    | Halyard Health FFP2 NR CE 0086           | FFP2 | 43924 new     | 63,59672   | 87,5754952  | 96,13861386 | 100         | 86,82322177 |
| 197 | hospital        | H2O2 sterrad    | Halyard Health FFP2 NR CE 0086           | FFP2 | 43924 new     | 92,95954   | 97,99197618 | 99,39751578 | 99,80879541 | 97,53945739 |
| 198 | hospital        | H2O2 sterrad    | Halyard Health FFP2 NR CE 0086           | FFP2 | 43924 new     | 80,97003   | 93,72983704 | 98,05636941 | 100         | 93,18905807 |
| 199 | hospital        | 2x H2O2 sterrad | Halyard Health FFP2 NR CE 0086           | FFP2 | 43924 new     | 58,84165   | 84,11702725 | 94,28510274 | 100         | 84,310944   |
| 200 | hospital        | 2x H2O2 sterrad | Halyard Health FFP2 NR CE 0086           | FFP2 | 43924 new     | 60,45078   | 85,05408823 | 94,82876712 | 100         | 85,08340886 |
| 201 | hospital        | 2x H2O2 sterrad | Halyard Health FFP2 NR CE 0086           | FFP2 | 43924 new     | 60,74487   | 85,5483578  | 95,00294744 | 100         | 85,32341251 |
| 202 | hospital        | 2x H2O2 sterrad | Halyard Health FFP2 NR CE 0086           | FFP2 | 43924 new     | 65,09339   | 88,33175512 | 96,65805106 | 99,80879541 | 87,47299909 |
| 203 | hospital        | 121 steam       | Bei Bei Safety B702 FFP2 CE0194          | FFP2 | 43924 new     | 68,97367   | 86,6169243  | 94,56306635 | 96,67170953 | 86,70634219 |
| 204 | hospital        | 121 steam       | Bei Bei Safety B702 FFP2 CE0194          | FFP2 | 43924 new     | 69,12813   | 86,60277663 | 94,42766379 | 99,84871407 | 87,50182154 |
| 205 | hospital        | 121 steam       | Bei Bei Safety B702 FFP2 CE0194          | FFP2 | 43924 new     | 69,03448   | 85,51020408 | 93,78002174 | 100         | 87,08117691 |
| 206 | hospital        | 121 steam       | Bei Bei Safety B702 FFP2 CE0194          | FFP2 | 43924 new     | 68,72386   | 88,04314519 | 95,29820133 | 99,8489426  | 87,97853772 |
| 207 | hospital        | 121 steam       | 3M Aura 1862+                            | FFP2 | 43928 new     | 88,50561   | 94,44343332 | 97,5569307  | 100         | 95,12618341 |
| 208 | hospital        | 121 steam       | 3M Aura 1862+                            | FFP2 | 43928 new     | 89,19773   | 94,81350342 | 97,62917698 | 100         | 95,41010372 |
| 209 | hospital        | 121 steam       | 3M Aura 1862+                            | FFP2 | 43928 new     | 95,59038   | 98,33348901 | 99,34243224 | 100         | 98,31657629 |
| 210 | hospital        | 121 steam       | 3M Aura 1862+                            | FFP2 | 43928 new     | 93,62714   | 97,29830711 | 98,84925641 | 100         | 97,44367682 |
| 211 | hospital        | 2x 121 steam    | 3M Aura 1862+                            | FFP2 | 43928 new     | 90,02049   | 95,35218701 | 97,87566386 | 100         | 95,81208611 |
| 212 | hospital        | 2x 121 steam    | 3M Aura 1862+                            | FFP2 | 43928 new     | 89,90606   | 95,27631781 | 97,72727273 | 99,72144847 | 95,65777576 |
| 213 | hospital        | 2x 121 steam    | 3M Aura 1862+                            | FFP2 | 43928 new     | 91,69526   | 96,28922616 | 98,25177494 | 100         | 96,55906558 |
| 214 | hospital        | 2x 121 steam    | 3M Aura 1862+                            | FFP2 | 43928 new     | 88,5007    | 94,42412808 | 97,68302924 | 100         | 95,15196497 |
| 215 | hospital        | 2x 121 steam    | 3M Aura 1862+                            | FFP2 | 43928 new     | 91,69526   | 96,28922616 | 98,25177494 | 100         | 96,55906558 |
| 216 | hospital        | 2x 121 steam    | 3M Aura 1862+                            | FFP2 | 43928 new     | 88,5007    | 94,42412808 | 97,68302924 | 100         | 95,15196497 |
| 217 | hospital        | 3x 121 steam    | 3M Aura 1862+                            | FFP2 | 43928 new     | 86,67133   | 93,5994027  | 97,1801679  | 100         | 94,36272398 |
| 218 | hospital        | 3x 121 steam    | 3M Aura 1862+                            | FFP2 | 43928 new     | 90,37016   | 95,61685176 | 97,97302145 | 100         | 95,99008222 |
| 219 | hospital        | 3x 121 steam    | 3M Aura 1862+                            | FFP2 | 43928 new     | 91,49041   | 96,2441135  | 98,41420029 | 100         | 96,53718128 |
| 220 | hospital        | 3x 121 steam    | 3M Aura 1862+                            | FFP2 | 43928 new     | 89,23535   | 95,02147001 | 97,82378321 | 100         | 95,52014971 |
| 221 | hospital        | 3x 121 steam    | 3M Aura 1862+                            | FFP2 | 43928 new     | 89,27824   | 95,28996058 | 97,93655682 | 99,51100244 | 95,50399392 |
| 222 | hospital        | 3x 121 steam    | 3M Aura 1862+                            | FFP2 | 43928 new     | 94,70608   | 97,95493235 | 99,2223591  | 100         | 97,97084289 |
| 223 | hospital        | 4x 121 steam    | 3M Aura 1862+                            | FFP2 | 43928 new     | 93,32301   | 97,18544983 | 98,84815232 | 99,47229551 | 97,20722624 |
| 224 | hospital        | 4x 121 steam    | 3M Aura 1862+                            | FFP2 | 43928 new     | 87,0379    | 97,04225864 | 99,73614776 | 100         | 94,39288901 |
| 225 | hospital        | 4x 121 steam    | 3M Aura 1862+                            | FFP2 | 43928 new     | 81,77288   | 90,63320996 | 95,31573405 | 99,41089838 | 91,78318137 |
| 226 | hospital        | 4x 121 steam    | 3M Aura 1862+                            | FFP2 | 43928 new     | 81,94189   | 90,74219346 | 95,40288318 | 99,85272459 | 91,98492219 |
| 227 | hospital        | 5x 121 steam    | 3M Aura 1862+                            | FFP2 | 43928 new     | 87,88783   | 94,33878102 | 97,73750646 | 100         | 94,99103032 |
| 228 | hospital        | 5x 121 steam    | 3M Aura 1862+                            | FFP2 | 43928 new     | 80,11737   | 89,47079909 | 94,74791467 | 100         | 91,08402066 |
| 229 | hospital        | 5x 121 steam    | 3M Aura 1862+                            | FFP2 | 43928 new     | 92,46266   | 96,62786051 | 98,58988119 | 99,42028986 | 96,77517238 |
| 230 | hospital        | 5x 121 steam    | 3M Aura 1862+                            | FFP2 | 43928 new     | 89,65871   | 95,09433351 | 97,79414486 | 100         | 95,63679654 |
| 230 | hospital        | 121 steam       | Uvex silv-Air 5220+                      | FFP2 | 43928 new     | 97,78465   | 98,99878877 | 99,39293598 | 100         | 99,04409362 |
| 231 | hospital        | 121 steam       | Uvex silv-Air 5220+                      | FFP2 | 43928 new     | 95,48963   | 97,47363625 | 98,40691685 | 99,59128065 | 97,74036577 |
| 232 | hospital        | 121 steam       | Uvex silv-Air 5220+                      | FFP2 | 43928 new     | 95,86713   | 98,62193064 | 99,41819001 | 100         | 98,47681155 |
| 233 | hospital        | 121 steam       | Uvex silv-Air 5220+                      | FFP2 | 43928 new     | 98,26755   | 99,5015256  | 99,84610187 | 99,78540773 | 99,35014574 |
| 234 |                 |                 |                                          |      |               |            |             |             |             |             |

|     |                      |                                  |                                   |          |              |          |             |             |             |             |
|-----|----------------------|----------------------------------|-----------------------------------|----------|--------------|----------|-------------|-------------|-------------|-------------|
| 284 | general practitioner | 121 steam (23min home system)    | SW1016                            | FFP3     | 43930 used   | 64,84574 | 86,33019022 | 92,76467318 | 100         | 85,9851516  |
| 285 | general practitioner | 121 steam (23min home system)    | SW1016                            | FFP3     | 43930 used   | 64,52487 | 85,03297542 | 92,63362719 | 100         | 85,54786861 |
| 286 | general practitioner | 121 steam (23min home system)    | 3M with one-way valve             | FFP2     | 43930 used   | 62,18913 | 95,18803882 | 96,29275988 | 99,5412844  | 95,80280319 |
| 287 | general practitioner | 121 steam (23min home system)    | 3M with one-way valve             | FFP2     | 43930 used   | 90,30534 | 94,00519273 | 95,57455995 |             | 94,97127379 |
| 288 | general practitioner | 2x 121 steam (23min home system) | 3M with one-way valve             | FFP2     | 43930 2xused | 76,44349 | 85,12216241 | 88,86714596 | 97,04797048 | 86,87019305 |
| 289 | general practitioner | 2x 121 steam (23min home system) | 3M with one-way valve             | FFP2     | 43930 2xused | 78,54157 | 86,19293217 | 90,03701025 | 99,07749077 | 88,46224965 |
| 290 | general practitioner | 121 steam (23min home system)    | 3M Aura 1862+                     | FFP2     | 43930 used   | 96,20031 | 98,50039982 | 99,34424806 | 100         | 98,51123839 |
| 291 | general practitioner | 121 steam (23min home system)    | 3M Aura 1862+                     | FFP2     | 43930 used   | 96,60227 | 98,6964761  | 99,46584444 | 100         | 98,69114853 |
| 292 | general practitioner | 121 steam (23min home system)    | 3M Aura 1862+                     | FFP2     | 43930 used   | 97,80982 | 99,24299136 | 99,70263539 | 100         | 99,18886227 |
| 293 | general practitioner | 121 steam (23min home system)    | 3M Aura 1862+                     | FFP2     | 43930 used   | 97,30619 | 99,02240019 | 99,57253838 | 99,7826087  | 98,92093309 |
| 294 | general practitioner | 121 steam (23min home system)    | SH2920V                           | FFP2     | 43930 used   | 90,69033 | 97,17101471 | 98,99074533 | 99,05277402 | 96,47621616 |
| 295 | general practitioner | 121 steam (23min home system)    | SH2920V                           | FFP2     | 43930 used   | 92,93997 | 97,95857625 | 99,18117074 | 97,83491204 | 96,9786573  |
| 296 | general practitioner | 121 steam (23min home system)    | SH2920V                           | FFP2     | 43930 used   | 93,53829 | 98,04008147 | 99,22468719 | 99,00497512 | 97,45200894 |
| 297 | general practitioner | 121 steam (23min home system)    | SH2920V                           | FFP2     | 43930 used   | 91,44134 | 97,05157605 | 98,81016351 | 98,25870647 | 96,39044719 |
| 298 | general practitioner | 121 steam (23min home system)    | SH2920V                           | FFP2     | 43930 used   | 90,97974 | 97,54859882 | 99,08282251 | 97,76785714 | 96,34475559 |
| 299 | general practitioner | 121 steam (23min home system)    | SH2920V                           | FFP2     | 43930 used   | 93,56903 | 98,54948058 | 99,50223533 | 99,10714286 | 97,6819731  |
| 300 | general practitioner | 121 steam (23min home system)    | SH2920V                           | FFP2     | 43930 used   | 94,24289 | 98,42369339 | 98,98226229 | 81,81818182 | 93,36675629 |
| 301 | general practitioner | 121 steam (23min home system)    | SH2920V                           | FFP2     | 43930 used   | 99,94916 | 96,97267213 | 99,01134051 | 95          | 95,23329195 |
| 302 | independent CSA      | 121 steam                        | Willson 9004                      | FFP2     | 43930 new    | 55,1321  | 83,76603764 | 95,56358856 | 100         | 83,61543072 |
| 303 | independent CSA      | 121 steam                        | Willson 9004                      | FFP2     | 43930 new    | 53,79773 | 81,9538011  | 94,4216234  | 100         | 82,54328983 |
| 304 | independent CSA      | 121 steam                        | Willson 9004                      | FFP2     | 43930 new    | 52,33019 | 82,17496375 | 94,83197556 | 100         | 82,33428314 |
| 305 | independent CSA      | 121 steam                        | Willson 9004                      | FFP2     | 43930 new    | 55,94387 | 83,85279293 | 95,12050238 | 100         | 83,72929014 |
| 306 | independent CSA      | 121 steam                        | Willson 9004                      | FFP2     | 43930 new    | 44,06984 | 78,04928989 | 93,37753974 | 100         | 78,87416747 |
| 307 | independent CSA      | 121 steam                        | Willson 9004                      | FFP2     | 43930 new    | 44,99512 | 77,5808569  | 92,73144606 | 100         | 78,82685458 |
| 308 | independent CSA      | 121 steam                        | Willson 9004                      | FFP2     | 43930 new    | 51,22891 | 85,61962727 | 96,65026769 | 100         | 83,37470087 |
| 309 | independent CSA      | 121 steam                        | Willson 9004                      | FFP2     | 43930 new    | 49,5208  | 84,62233978 | 96,31746491 | 100         | 82,61515191 |
| 319 | Uni Hospital         | H2O2 sterrad                     | Kolmi roze OP-Air pro Oxygen      | FFP1 IIR | 43912 new    | NP       | 85,43725006 |             | 99,95959868 | 92,69842437 |
| 320 | Uni Hospital         | H2O2 sterrad                     | Kolmi roze OP-Air pro Oxygen      | FFP1 IIR | 43912 new    | NP       | 83,50094096 |             | 99,81646256 | 91,65870176 |
| 321 | Uni Hospital         | H2O2 sterrad                     | 3M Aura 1862+                     | FFP2     | 43912 new    | NP       | 99,55708049 |             | 98,75679355 | 99,15699705 |
| 322 | Uni Hospital         | 121 steam                        | 3M 1861+                          | FFP1     | 43912 new    | NP       | 94,10310281 |             | 97,6163219  | 95,81466732 |
| 323 | Uni Hospital         | 121 steam                        | 3M 1861+                          | FFP1     | 43912 new    | NP       | 89,38471604 |             | 96,82099299 | 93,10285451 |
| 324 | Uni Hospital         | 121 steam                        | 3M 1861+                          | FFP1     | 43912 new    | NP       | 87,33698585 |             | 98,08497726 | 92,71098156 |
| 325 | Uni Hospital         | 121 steam                        | 3M 1861+                          | FFP1     | 43912 new    | NP       | 95,73446097 |             | 97,88066199 | 96,80756148 |
| 326 | Uni Hospital         | 121 steam                        | 3M Aura 1862+                     | FFP2     | 43912 new    | NP       | 96,73796752 |             | 98,57325611 | 97,65561182 |
| 327 | Uni Hospital         | 121 steam                        | 3M Aura 1862+                     | FFP2     | 43912 new    | NP       | 94,45490227 |             | 95,49582957 | 94,97536592 |
| 328 | Uni Hospital         | 3x 121 steam                     | 3M 1861+                          | FFP1     | 43912 new    | NP       | 94,01301281 |             | 97,6163219  | 95,81466735 |
| 329 | Uni Hospital         | 3x 121 steam                     | 3M 1861+                          | FFP1     | 43912 new    | NP       | 89,38471604 |             | 96,82099299 | 93,10285451 |
| 330 | Uni Hospital         | 3x 121 steam                     | 3M 1861+                          | FFP1     | 43912 new    | NP       | 87,33698585 |             | 98,08497726 | 92,71098156 |
| 331 | Uni Hospital         | 3x 121 steam                     | 3M 1861+                          | FFP1     | 43912 new    | NP       | 95,73446097 |             | 97,88066199 | 96,80756148 |
| 332 | Uni Hospital         | 3x 121 steam                     | 3M 1861+                          | FFP1     | 43912 new    | NP       | 98,10817547 |             | 98,16577991 | 98,48382769 |
| 333 | Uni Hospital         | 5x 121 steam                     | 3M Aura 1862+                     | FFP2     | 43912 new    | NP       | 96,89956346 |             | 98,22695905 | 97,56326126 |
| 334 | Uni Hospital         | 5x 121 steam                     | 3M Aura 1862+                     | FFP2     | 43912 new    | NP       | 97,84211556 |             | 97,04493175 | 97,44352366 |
| 335 | Uni Hospital         | 5x 121 steam                     | 3M Aura 1862+                     | FFP2     | 43912 new    | NP       | 96,49942113 |             | 95,96448493 | 96,23195303 |
| 336 | Uni Hospital         | 121 steam                        | 3M Aura 1862+                     | FFP2     | 43934 used   | 95,10398 | 97,9088681  | 99,09557534 |             | 99,13232104 |
| 337 | Uni Hospital         | 121 steam                        | 3M Aura 1862+                     | FFP2     | 43934 used   | 96,87049 | 98,76581302 | 99,4906114  |             | 98,73834393 |
| 338 | Uni Hospital         | 121 steam                        | 3M Aura 1862+                     | FFP2     | 43934 used   | 96,55739 | 98,61833156 | 99,4542265  |             | 98,61171367 |
| 339 | Uni Hospital         | 121 steam                        | 3M Aura 1862+                     | FFP2     | 43934 used   | 95,81635 | 98,25661386 | 99,37106101 |             | 99,82646421 |
| 340 | Uni Hospital         | 121 steam                        | 3M Aura 1862+                     | FFP2     | 43934 used   | 89,84354 | 94,99804975 | 97,59859658 |             | 95,52327885 |
| 341 | Uni Hospital         | 121 steam                        | 3M Aura 1862+                     | FFP2     | 43934 used   | 97,38233 | 99,03826562 | 99,66214021 |             | 99,82729891 |
| 342 | Uni Hospital         | 121 steam                        | 3M Aura 1862+                     | FFP2     | 43934 used   | 95,91246 | 98,35364114 | 99,13196024 |             | 98,21936341 |
| 343 | Uni Hospital         | 121 steam                        | 3M Aura 1862+                     | FFP2     | 43934 used   | 97,8207  | 99,21446716 | 99,69332727 |             | 99,18212242 |
| 344 | Uni Hospital         | 121 steam                        | 3M Aura 1862+                     | FFP2     | 43934 used   | 95,83606 | 98,40875264 | 99,36066532 |             | 98,35798518 |
| 345 | Uni Hospital         | 121 steam                        | 3M Aura 1862+                     | FFP2     | 43934 used   | 97,26341 | 98,91562314 | 99,47501787 |             | 99,13232104 |
| 346 | Uni Hospital         | 121 steam                        | 3M Aura 1862+                     | FFP2     | 43934 used   | 95,32976 | 98,05246847 | 99,12156455 |             | 97,04989154 |
| 347 | Uni Hospital         | 121 steam                        | 3M Aura 1862+                     | FFP2     | 43934 used   | 97,48463 | 99,03593696 | 99,67773734 |             | 99,04957471 |
| 348 | Uni Hospital         | H2O2 sterrad                     | MediCom 20925-WH                  | IIR FFP2 | 43934 used   | 87,78923 | 94,01664539 | 97,30787119 |             | 99,41348974 |
| 349 | Uni Hospital         | H2O2 sterrad                     | MediCom 20925-WH                  | IIR FFP2 | 43934 used   | 92,25061 | 96,59086035 | 98,50072501 |             | 96,83554992 |
| 350 | Uni Hospital         | H2O2 sterrad                     | MediCom 20925-WH                  | IIR FFP2 | 43934 used   | 90,17947 | 95,47000205 | 98,25449372 |             | 95,9759922  |
| 351 | Uni Hospital         | H2O2 sterrad                     | MediCom 20925-WH                  | IIR FFP2 | 43934 used   | 88,91349 | 94,7935665  | 97,59787694 |             | 95,32623349 |
| 352 | Uni Hospital         | H2O2 sterrad                     | MediCom 20925-WH                  | IIR FFP2 | 43934 used   | 91,00595 | 95,86132244 | 98,07939591 |             | 96,2366673  |
| 353 | Uni Hospital         | H2O2 sterrad                     | MediCom 20925-WH                  | IIR FFP2 | 43934 used   | 88,55193 | 94,51743681 | 97,60882055 |             | 95,16954623 |
| 354 | Uni Hospital         | H2O2 sterrad                     | MediCom 20925-WH                  | IIR FFP2 | 43934 used   | 89,78312 | 95,36379883 | 97,9809034  |             | 95,78195497 |
| 355 | Uni Hospital         | H2O2 sterrad                     | Kolmi OP-Air Pro Oxygen M51010-BL | FFP2     | 43934 used   | 92,24226 | 98,66765382 | 98,73054089 |             | 99,1202346  |
| 356 | Uni Hospital         | H2O2 sterrad                     | Kolmi OP-Air Pro Oxygen M51010-BL | FFP2     | 43934 used   | 90,24275 | 95,45529742 | 97,99731881 |             | 95,92384057 |
| 357 | Uni Hospital         | H2O2 sterrad                     | Kolmi OP-Air Pro Oxygen M51010-BL | FFP2     | 43934 used   | 91,86057 | 96,57942303 | 98,6594074  |             | 96,77485004 |
| 358 | Uni Hospital         | H2O2 sterrad                     | Kolmi OP-Air Pro Oxygen M51010-BL | FFP2     | 43934 used   | 92,39012 | 96,68072504 | 98,71959728 |             | 96,94761134 |
| 359 | Uni Hospital         | H2O2 sterrad                     | Kolmi OP-Air Pro Oxygen M51010-BL | FFP2     | 43934 used   | 88,15114 | 94,36384989 | 97,30787119 |             | 94,95571488 |
| 360 | independent CSA      | 121 steam                        | 3M Aura 1862+                     | FFP2     | 43935 2xused | 83,84132 | 97,21055874 | 98,85218878 |             | 99,50124688 |
| 361 | independent CSA      | 121 steam                        | 3M Aura 1862+                     | FFP2     | 43935 2xused | 85,25312 | 92,21573769 | 96,38115567 |             | 99,6996997  |
| 362 | independent CSA      | 121 steam                        | 3M Aura 1862+                     | FFP2     | 43935 3xused | 91,20346 | 95,83860128 | 98,21982252 |             | 99,83164983 |
| 363 | independent CSA      | 121 steam                        | 3M Aura 1862+                     | FFP2     | 43935 3xused | 89,17983 | 94,49509856 | 97,59022641 |             | 99,80806142 |
| 364 | general practitioner | 121 steam (23min home system)    | 3M Aura 1862+                     | FFP2     | 43935 new    | 96,60742 | 99,08261851 | 99,70533266 |             | 99,43899018 |
| 365 | general practitioner | 121 steam (23min home system)    | 3M Aura 1862+                     | FFP2     | 43935 new    | 96,86759 | 99,13639328 | 99,68350545 |             | 98,68811824 |
| 366 | general practitioner | 121 steam (23min home system)    | 3M Aura 1862+                     | FFP2     | 43935 2xused | 93,30998 | 97,02151994 | 98,85407146 |             | 99,81299673 |
| 367 | general practitioner | 121 steam (23min home system)    | 3M Aura 1862+                     | FFP2     | 43935 2xused | 95,59651 | 98,24951091 | 99,35064049 |             | 98,43899018 |
| 368 | general practitioner | 121 steam (23min home system)    | 3M Aura 1862+                     | FFP2     | 43935 2xused | 93,95413 | 97,38028593 | 99,02868914 |             | 99,59077506 |
| 369 | general practitioner | 121 steam (23min home system)    | 3M Aura 1862+                     | FFP2     | 43935 2xused | 94,95024 | 97,86265362 | 99,09417077 |             | 99,93001652 |
| 370 | general practitioner | 121 steam (23min home system)    | 3M Aura 1862+                     | FFP2     | 43935 2xused | 95,60527 | 98,18128919 | 99,26333165 |             | 98,16896922 |
| 371 | general practitioner | 121 steam (23min home system)    | 3M Aura 1862+                     | FFP2     | 43935 3xused | 95,10139 | 97,95896664 | 99,20876362 |             | 98,06728053 |
| 372 | general practitioner | 121 steam (23min home system)    | 3M Aura 1862+                     | FFP2     | 43935 3xused | 92,03769 | 96,34973664 | 98,38478643 |             | 96,64630134 |
| 373 | general practitioner | 121 steam (23min home system)    | 3M Aura 1862+                     | FFP2     | 43935 3xused | 94,74444 | 97,765538   | 99,06688676 |             | 99,62599345 |
| 374 | general practitioner | 121 steam (23min home system)    | Maco Pharma Z2M05                 | FFP2     | 43935 2xused | 89,51817 | 96,50223225 | 98,9413803  |             | 96,24044524 |
| 375 | general practitioner | 121 steam (23min home system)    | Maco Pharma Z2M06                 | FFP2     | 43935 2xused | 85,93428 | 94,74933534 | 98,46118167 |             | 94,69269794 |
| 376 | general practitioner | 121 steam (23min home system)    | Maco Pharma Z2M07                 | FFP2     | 43935 2xused | 84,53576 | 94,20195636 | 98,12831671 |             | 94,16975683 |
| 377 | general practitioner | 121 steam (23min home system)    | SH2920V                           | FFP2     | 43935 2xused | 89,12437 | 96,37542012 | 98,77221942 |             | 95,83424858 |
| 378 | general practitioner | 121 steam (23min home system)    | SH2920V                           | FFP2     | 43935 2xused | 89,89068 | 96,48618009 | 98,84315785 |             | 97,75596073 |
| 379 | general practitioner | 121 steam (23min home system)    | SH2920V                           | FFP2     | 43935 2xused | 90,61017 | 97,11462252 | 99,06142996 |             | 97,9429646  |
| 380 | general practitioner | 121 steam (23min home system)    | SH2920V                           | FFP2     | 43935 2xused | 89,48012 | 96,69405658 | 98,85407146 |             | 96,16355951 |
| 381 | independent CSA      | 121 steam                        | 3M1873V+                          | FFP2     | 43936 new    | 98,36599 | 99,47796955 | 99,8226769  |             | 99,41665924 |
| 382 | independent CSA      | 121 steam                        | Asatex FFP3                       | FFP3     | 43936 new    | 98,4083  | 99,49169192 | 99,82698962 |             | 100         |
| 383 | independent CSA      | 121 steam                        | KN95 wit                          | FFP2     | 43936 new    | 49,78336 | 72,87457538 | 86,97626354 |             | 98,97884756 |
| 384 | independent CSA      | 121 steam                        | N wit met bloem                   | FFP2     | 43936 new    | 58,76075 | 81,82622389 | 92,85667837 |             | 98,43260188 |
| 385 | hospital             | 1xH2O2 sterrad                   | FFP3EGE4015V                      | FFP2     | 43936 new    | 68,04462 | 87,86346164 | 95,17176041 |             | 99,59266802 |
| 386 | hospital             | 2xH2O2 sterrad                   | FFP3EGE4015V                      | FFP2     | 43936 new    | 57,6112  | 84,01034929 | 94,11312849 |             | 98,39366834 |
| 387 | hospital             | 1xH2O2 sterrad                   | FFP2 3M Aura 1862+                | FFP2     | 43936 new    | 32,6435  | 79,25632895 | 96,4118803  |             |             |

|     |                 |              |                                                  |           |           |          |             |             |             |             |
|-----|-----------------|--------------|--------------------------------------------------|-----------|-----------|----------|-------------|-------------|-------------|-------------|
| 432 | Uni Hospital    | 1x 121 steam | 3M aura 1862+ (GIRBES) MASK 5                    | FFP2      | 43952 new | 98,3414  | 99,38597554 | 99,65725477 | 99,87228608 | 99,31422806 |
| 433 | Uni Hospital    | 1x 121 steam | 3M aura 1862+ (GIRBES) MASK 6                    | FFP2      | 43952 new | 94,68985 | 97,44977006 | 98,70803949 | 99,73718791 | 97,64621144 |
| 434 | Uni Hospital    | 1x 121 steam | 3M aura 1862+ (GIRBES) MASK 7                    | FFP2      | 43952 new | 97,63538 | 99,08716973 | 99,47104677 | 99,84459984 | 99,00954964 |
| 435 | Uni Hospital    | 1x 121 steam | 3M aura 1862+ (GIRBES) MASK 8                    | FFP2      | 43952 new | 98,45226 | 99,4078319  | 99,74008737 | 100         | 99,40004547 |
| 436 | Uni Hospital    | 1x 121 steam | 3M aura 1862+ (GIRBES) MASK 9                    | FFP2      | 43952 new | 98,2864  | 99,35689943 | 99,70767666 | 99,92412747 | 99,31877488 |
| 437 | Uni Hospital    | 1x 121 steam | 3M aura 1862+ (GIRBES) MASK 10                   | FFP2      | 43952 new | 97,42655 | 98,83197835 | 99,39011109 | 99,85228951 | 98,87523149 |
| 438 | Uni Hospital    | 1x 121 steam | 3M aura 1862+ (GIRBES) MASK 11                   | FFP2      | 43952 new | 95,8168  | 98,02539667 | 98,87382211 | 100         | 98,17900346 |
| 439 | Uni Hospital    | 1x 121 steam | 3M aura 1862+ (GIRBES) MASK 12                   | FFP2      | 43952 new | 98,92318 | 99,62829326 | 99,83010052 | 99,89118607 | 99,56819063 |
| 440 | Uni Hospital    | 1x 121 steam | KN95 Staat & Co3 (Sterilized)                    | FFP2      | 43958 new | 53,31506 | 71,16055181 | 79,52139054 | 99,06976744 | 75,76669257 |
| 441 | Uni Hospital    | 1x 121 steam | KN95 Staat & Co4 (Sterilized)                    | FFP2      | 43958 new | 15,51218 | 33,40396018 | 47,49188258 | 98,03001876 | 48,60950971 |
| 442 | Uni Hospital    | 1x 121 steam | 3M Aura 9320+                                    | FFP2      | 43958 new | 91,31098 | 94,38839217 | 96,00184733 | 95,98662207 | 94,42196127 |
| 443 | Uni Hospital    | 1x 121 steam | 3M Aura 9322+ met ademventiel                    | FFP2      | 43958 new | 93,91226 | 96,87979423 | 97,92618697 | 99,62112122 | 97,08486401 |
| 444 | Uni Hospital    | 1x 121 steam | 3M 8822 met ademventiel1                         | FFP2      | 43958 new | 93,22059 | 95,18586633 | 95,59354548 | 87,39495798 | 92,84873979 |
| 445 | Uni Hospital    | 1x 121 steam | Isolatiemasker Kangya Medical                    | FFP2      | 43958 new | 59,76721 | 77,19312281 | 85,64166667 | 99,51737452 | 80,52984259 |
| 446 | hospital        | 1x 121 steam | GB262-2006KN95                                   | KN95 FFP2 | 43958 new | 64,73795 | 88,29735533 | 95,07373091 | 100         | 87,02725789 |
| 447 | hospital        | 1x 121 steam | KN95 GB2626-2006                                 | KN95 FFP2 | 43958 new | 61,14693 | 82,21305245 | 90,73384961 | 98,51851852 | 83,15308685 |
| 448 | hospital        | 1x 121 steam | GB2626-2006KN95                                  | KN95 FFP2 | 43958 new | 58,94106 | 77,63009169 | 87,15321717 | 99,66216216 | 80,84663306 |
| 449 | hospital        | 1x 121 steam | 1003 2626-2006KN95                               | KN95 FFP2 | 43958 new | 65,19435 | 78,6973125  | 86,18925193 | 99,31623932 | 82,34982918 |
| 450 | hospital        | 1x 121 steam | 243 S5                                           | KN95 FFP2 | 43958 new | 21,71642 | 41,9605744  | 57,12844488 | 98,00724638 | 54,70317219 |
| 451 | independent CSA | 1x 121 steam | NRW Test Laurens (244 S1)                        | KN95 FFP2 | 43958 new | 84,72166 | 92,4573651  | 94,9720914  | 91,66666667 | 90,95444678 |
| 452 | independent CSA | 1x 121 steam | 2EX Test Laurens (244 S2)                        | KN95 FFP2 | 43958 new | 68,21063 | 82,13627882 | 88,12926507 | 99,46808511 | 84,48606386 |
| 453 | independent CSA | 1x 121 steam | Nieuw Test Laurens (244 S3)                      | KN95 FFP2 | 43958 new | 87,74855 | 93,26662782 | 94,74979822 | 98,75       | 93,62874371 |
| 454 | independent CSA | 1x 121 steam | Nieuw Test Laurens (244 S4)                      | KN95 FFP2 | 43958 new | 41,64207 | 69,21451206 | 81,07105924 | 99,33510638 | 72,8156879  |
| 455 | independent CSA | 1x 121 steam | Nieuw Test Zellingen (244 S5)                    | KN95 FFP2 | 43958 new | 95,63387 | 98,52528005 | 99,1225617  | 98,67374005 | 97,98886233 |
| 456 | independent CSA | 1x 121 steam | 2e x test Pelie (244 S6)                         | KN95 FFP2 | 43958 new | 45,53338 | 63,91617773 | 74,01995197 | 99,59785523 | 70,76684009 |
| 457 | independent CSA | 1x 121 steam | 2e x X (244 S7)                                  | KN95 FFP2 | 43958 new | 36,65227 | 63,00251706 | 75,7865054  | 99,2        | 68,66032192 |
| 458 | independent CSA | 1x 121 steam | Personeel (244 S8)                               | KN95 FFP2 | 43958 new | 82,34477 | 92,96903348 | 96,21089159 | 99,79757085 | 92,83056735 |
| 459 | independent CSA | 1x 121 steam | X (244 S9)                                       | KN95 FFP2 | 43958 new | 89,34398 | 95,15293636 | 96,72416076 | 93,92857123 | 91,28741292 |
| 460 | independent CSA | 1x 121 steam | Test nieuw argos (244 S10)                       | KN95 FFP2 | 43958 new | 76,97131 | 85,56481455 | 89,09775673 | 99,71590997 | 87,8374467  |
| 461 | independent CSA | 1x 121 steam | Nieuw Test Laurens (244 S11)                     | KN95 FFP2 | 43958 new | 33,04128 | 64,76237792 | 78,46246006 | 98,84615385 | 68,77806854 |
| 462 | independent CSA | 1x 121 steam | Test 2e keer sterilisatie naamloos (24 KN95 FFP2 | KN95 FFP2 | 43958 new | 23,34    | 46,2739407  | 61,2988626  | 96,41509434 | 56,83197505 |
| 463 | independent CSA | 1x 121 steam | Test nieuw Vivia 2 (244 S13)                     | KN95 FFP2 | 43958 new | 55,01159 | 82,14162682 | 90,23619229 | 99,26315789 | 81,66314253 |
| 464 | independent CSA | 1x 121 steam | Nieuw Test Bussum 3 (244 S14)                    | KN95 FFP2 | 43958 new | 70,76278 | 86,10557769 | 91,39596974 | 99,25093633 | 86,87881494 |
| 465 | independent CSA | 1x 121 steam | Afkeur +2 Vivum groep (244 S15)                  | KN95 FFP2 | 43958 new | 35,57006 | 58,94529694 | 71,92237631 | 100         | 66,6094326  |
| 466 | independent CSA | 1x 121 steam | 2e Test Aafje (244 S16)                          | KN95 FFP2 | 43958 new | 87,13463 | 93,38288338 | 95,58490455 | 99,45799458 | 93,89010332 |
| 467 | independent CSA | 1x 121 steam | Nieuw Test Argos (244 S17)                       | KN95 FFP2 | 43958 new | 31,65141 | 59,17628082 | 73,38503861 | 99,375      | 65,89693178 |
| 468 | independent CSA | 1x 121 steam | 2e x Test Aafje (244 S18)                        | KN95 FFP2 | 43958 new | 84,27536 | 91,52825706 | 93,82878972 | 99,4140625  | 92,26161616 |
| 469 | independent CSA | 1x 121 steam | 2e x test Aafje (244 S19)                        | KN95 FFP2 | 43958 new | 82,89718 | 92,49845552 | 91,6152768  | 98,4496124  | 90,62038056 |
| 470 | independent CSA | 1x 121 steam | GB262-2006KN95                                   | KN95 FFP2 | 43964 new | 74,66827 | 79,12414135 | 83,06226082 | 97,85894207 | 83,67840255 |
| 471 | independent CSA | 1x 121 steam | KN95 GB2626-2006                                 | KN95 FFP2 | 43964 new | 58,45211 | 78,55219258 | 88,49248736 | 99,89384289 | 81,3476572  |
| 472 | independent CSA | 1x 121 steam | GB2626-2006KN95                                  | KN95 FFP2 | 43964 new | 28,09011 | 44,52131344 | 60,57180366 | 97,82608696 | 57,75232827 |
| 473 | independent CSA | 1x 121 steam | 1003 2626-2006KN95                               | KN95 FFP2 | 43964 new | 27,2581  | 47,79913205 | 64,82461712 | 100         | 59,97046124 |
| 474 | independent CSA | 1x 121 steam | 243 S5                                           | KN95 FFP2 | 43964 new | 80,6685  | 92,49861836 | 96,77585614 | 99,64664311 | 92,39740377 |
| 475 | independent CSA | 1x 121 steam | 243 S5                                           | KN95 FFP2 | 43964 new | 50,14545 | 71,79966096 | 82,97851751 | 99,77011494 | 76,17343673 |
| 476 | independent CSA | 1x 121 steam | 243 S5                                           | KN95 FFP2 | 43964 new | 87,44977 | 92,4578482  | 94,90032901 | 99,77011494 | 93,64451449 |
| 477 | independent CSA | 1x 121 steam | 243 S5                                           | KN95 FFP2 | 43964 new | 70,54419 | 78,96482808 | 85,88235294 | 99,50331126 | 83,72367071 |

H202 73  
steam 371

|     |                      | 1xSteam                       |               |      |           |        |      |      |      |       |      |
|-----|----------------------|-------------------------------|---------------|------|-----------|--------|------|------|------|-------|------|
|     |                      |                               |               |      |           |        |      |      |      |       |      |
| 361 | independent CSA      | 121 steam                     | 3M Aura 1862+ | FFP2 | 14-4-2020 | 2xused | 85,3 | 92,2 | 96,4 | 99,7  | 93,4 |
| 38  | Uni Hospital         | 121 steam                     | 3M Aura 1862+ | FFP2 | 25-3-2020 | 1xused | 86,0 | 93,1 | 99,7 | 100,0 | 94,7 |
| 40  | Uni Hospital         | 121 steam                     | 3M Aura 1862+ | FFP2 | 25-3-2020 | 1xused | 86,0 | 93,1 | 99,7 | 100,0 | 94,7 |
| 45  | Uni Hospital         | 121 steam                     | 3M Aura 1862+ | FFP2 | 25-3-2020 | 1xused | 86,0 | 93,1 | 99,7 | 100,0 | 94,7 |
| 36  | Uni Hospital         | 121 steam                     | 3M Aura 1862+ | FFP2 | 25-3-2020 | 1xused | 87,3 | 94,2 | 97,4 | 100,0 | 94,7 |
| 39  | Uni Hospital         | 121 steam                     | 3M Aura 1862+ | FFP2 | 25-3-2020 | 1xused | 87,7 | 93,9 | 97,2 | 100,0 | 94,7 |
| 41  | Uni Hospital         | 121 steam                     | 3M Aura 1862+ | FFP2 | 25-3-2020 | 1xused | 87,7 | 93,9 | 97,2 | 100,0 | 94,7 |
| 44  | Uni Hospital         | 121 steam                     | 3M Aura 1862+ | FFP2 | 25-3-2020 | 1xused | 87,7 | 93,9 | 97,2 | 100,0 | 94,7 |
| 46  | Uni Hospital         | 121 steam                     | 3M Aura 1862+ | FFP2 | 25-3-2020 | 1xused | 87,7 | 93,9 | 97,2 | 100,0 | 94,7 |
| 327 | Uni Hospital         | 121 steam                     | 3M Aura 1862+ | FFP2 | 22-3-2020 | new    | NP   | NP   | NP   | 95,5  | 95,0 |
| 207 | hospital             | 121 steam                     | 3M Aura 1862+ | FFP2 | 7-4-2020  | new    | 89   | 94   | 98   | 100   | 95,1 |
| 363 | independent CSA      | 121 steam                     | 3M Aura 1862+ | FFP2 | 14-4-2020 | 3xused | 89,2 | 94,5 | 97,6 | 99,8  | 95,3 |
| 37  | Uni Hospital         | 121 steam                     | 3M Aura 1862+ | FFP2 | 25-3-2020 | 1xused | 89,0 | 94,9 | 97,7 | 100,0 | 95,4 |
| 208 | hospital             | 121 steam                     | 3M Aura 1862+ | FFP2 | 7-4-2020  | new    | 89   | 95   | 98   | 100   | 95,4 |
| 42  | Uni Hospital         | 121 steam                     | 3M Aura 1862+ | FFP2 | 25-3-2020 | 1xused | 89,3 | 94,8 | 97,8 | 100,0 | 95,5 |
| 47  | Uni Hospital         | 121 steam                     | 3M Aura 1862+ | FFP2 | 25-3-2020 | 1xused | 89,3 | 94,8 | 97,8 | 100,0 | 95,5 |
| 340 | Uni Hospital         | 121 steam                     | 3M Aura 1862+ | FFP2 | 13-4-2020 | used   | 89,8 | 95,0 | 97,6 | 99,7  | 95,5 |
| 43  | Uni Hospital         | 121 steam                     | 3M Aura 1862+ | FFP2 | 25-3-2020 | 1xused | 89,7 | 95,1 | 97,9 | 100,0 | 95,7 |
| 48  | Uni Hospital         | 121 steam                     | 3M Aura 1862+ | FFP2 | 25-3-2020 | 1xused | 89,7 | 95,1 | 97,9 | 100,0 | 95,7 |
| 362 | independent CSA      | 121 steam                     | 3M Aura 1862+ | FFP2 | 14-4-2020 | 3xused | 91,2 | 95,8 | 98,2 | 99,8  | 96,3 |
| 84  | Uni Hospital         | 121 steam                     | 3M Aura 1862+ | FFP2 | 27-3-2020 | new    | 91,3 | 97,3 | 98,9 | 97,7  | 96,3 |
| 14  | Uni Hospital         | 121 steam                     | 3M Aura 1862+ | FFP2 | 24-3-2020 | new    | 92,2 | 97,2 | 99,3 | 100,0 | 97,2 |
| 15  | Uni Hospital         | 121 steam                     | 3M Aura 1862+ | FFP2 | 24-3-2020 | new    | 92,3 | 97,3 | 99,4 | 99,9  | 97,2 |
| 360 | independent CSA      | 121 steam                     | 3M Aura 1862+ | FFP2 | 14-4-2020 | 2xused | 93,8 | 97,2 | 98,9 | 99,5  | 97,4 |
| 346 | Uni Hospital         | 121 steam                     | 3M Aura 1862+ | FFP2 | 13-4-2020 | used   | 95,3 | 98,1 | 99,1 | 97,0  | 97,4 |
| 210 | hospital             | 121 steam                     | 3M Aura 1862+ | FFP2 | 7-4-2020  | new    | 94   | 97   | 99   | 100   | 97,4 |
| 326 | Uni Hospital         | 121 steam                     | 3M Aura 1862+ | FFP2 | 22-3-2020 | new    | NP   | NP   | NP   | 98,6  | 97,7 |
| 83  | Uni Hospital         | 121 steam                     | 3M Aura 1862+ | FFP2 | 27-3-2020 | new    | 93,7 | 98,1 | 99,3 | 100,0 | 97,8 |
| 336 | Uni Hospital         | 121 steam                     | 3M Aura 1862+ | FFP2 | 13-4-2020 | used   | 95,1 | 97,9 | 99,1 | 99,1  | 97,8 |
| 87  | Uni Hospital         | 121 steam                     | 3M Aura 1862+ | FFP2 | 27-3-2020 | new    | 93,7 | 98,2 | 99,5 | 100,0 | 97,8 |
| 17  | Uni Hospital         | 121 steam                     | 3M Aura 1862+ | FFP2 | 24-3-2020 | new    | 94,0 | 97,9 | 99,5 | 100,0 | 97,9 |
| 16  | Uni Hospital         | 121 steam                     | 3M Aura 1862+ | FFP2 | 24-3-2020 | new    | 94,0 | 98,0 | 99,6 | 100,0 | 97,9 |
| 342 | Uni Hospital         | 121 steam                     | 3M Aura 1862+ | FFP2 | 13-4-2020 | used   | 95,9 | 98,4 | 99,1 | 99,5  | 98,2 |
| 338 | Uni Hospital         | 121 steam                     | 3M Aura 1862+ | FFP2 | 13-4-2020 | used   | 96,6 | 98,6 | 99,5 | 98,6  | 98,3 |
| 209 | hospital             | 121 steam                     | 3M Aura 1862+ | FFP2 | 7-4-2020  | new    | 96   | 98   | 99   | 100   | 98,3 |
| 339 | Uni Hospital         | 121 steam                     | 3M Aura 1862+ | FFP2 | 13-4-2020 | used   | 95,8 | 98,3 | 99,4 | 99,8  | 98,3 |
| 344 | Uni Hospital         | 121 steam                     | 3M Aura 1862+ | FFP2 | 13-4-2020 | used   | 95,8 | 98,4 | 99,4 | 99,8  | 98,4 |
| 85  | Uni Hospital         | 121 steam                     | 3M Aura 1862+ | FFP2 | 27-3-2020 | new    | 95,3 | 98,8 | 99,7 | 100,0 | 98,4 |
| 345 | Uni Hospital         | 121 steam                     | 3M Aura 1862+ | FFP2 | 13-4-2020 | used   | 97,3 | 98,9 | 99,5 | 99,1  | 98,7 |
| 337 | Uni Hospital         | 121 steam                     | 3M Aura 1862+ | FFP2 | 13-4-2020 | used   | 96,9 | 98,8 | 99,5 | 99,8  | 98,7 |
| 341 | Uni Hospital         | 121 steam                     | 3M Aura 1862+ | FFP2 | 13-4-2020 | used   | 97,4 | 99,0 | 99,7 | 99,8  | 99,0 |
| 347 | Uni Hospital         | 121 steam                     | 3M Aura 1862+ | FFP2 | 13-4-2020 | used   | 97,5 | 99,0 | 99,7 | 100,0 | 99,0 |
| 49  | independent CSA      | 121 steam                     | 3M Aura 1862+ | FFP2 | 1-4-2020  | 1xused | 97,6 | 99,3 | 99,7 | 99,9  | 99,1 |
| 343 | Uni Hospital         | 121 steam                     | 3M Aura 1862+ | FFP2 | 13-4-2020 | used   | 97,8 | 99,2 | 99,7 | 100,0 | 99,2 |
| 86  | Uni Hospital         | 121 steam                     | 3M Aura 1862+ | FFP2 | 27-3-2020 | new    | 97,6 | 99,5 | 99,8 | 100,0 | 99,2 |
| 290 | general practitioner | 121 steam (23min home system) | 3M Aura 1862+ | FFP2 | 9-4-2020  | used   | 96   | 99   | 99   | 100   | 98,5 |
| 291 | general practitioner | 121 steam (23min home system) | 3M Aura 1862+ | FFP2 | 9-4-2020  | used   | 97   | 99   | 99   | 100   | 98,7 |
| 293 | general practitioner | 121                           |               |      |           |        |      |      |      |       |      |

|         |                 |              |                         |      |           |     |      |          |             |             |             |             |
|---------|-----------------|--------------|-------------------------|------|-----------|-----|------|----------|-------------|-------------|-------------|-------------|
| 189     | hospital        | H2O2 sterrad | 3M Aura 1862+           | FFP2 | 3-4-2020  | new | 70   | 86       | 94          | 100         | 87,4        |             |
| 190     | hospital        | H2O2 sterrad | 3M Aura 1862+           | FFP2 | 3-4-2020  | new | 76   | 89       | 95          | 100         | 90,1        |             |
| 187     | hospital        | H2O2 sterrad | 3M Aura 1862+           | FFP2 | 3-4-2020  | new | 90   | 96       | 98          | 99          | 96,0        |             |
| 188     | hospital        | H2O2 sterrad | 3M Aura 1862+           | FFP2 | 3-4-2020  | new | 97   | 99       | 100         | 100         | 98,9        |             |
| 321     | Uni Hospital    | H2O2 sterrad | 3M Aura 1862+           | FFP2 | 22-3-2020 | new | 98,0 | 99,6     | 99,8        | 98,8        | 99,0        |             |
|         |                 |              |                         |      |           |     | MEAN | 86,4     | 93,8        | 97,4        | 99,5        | 94,3        |
|         |                 |              |                         |      |           |     | SD   | 12,51663 | 6,28107042  | 2,630235234 | 0,476915728 | 5,271755983 |
| 1xSteam |                 |              |                         |      |           |     |      |          |             |             |             |             |
| 94      | hospital        | 121 steam    | kolmi OP-Air M51010 BL  | FFP2 | 27-3-2020 | new | 16,4 | 46,2     | 77,1        | 100,0       | 59,9        |             |
| 56      | independent CSA | 121 steam    | kolmi OP-Air M51010 BL  | FFP2 | 25-3-2020 | new | 8,0  | 61,8     | 84,8        | 99,9        | 63,6        |             |
| 58      | independent CSA | 121 steam    | kolmi OP-Air M51010 BL  | FFP2 | 25-3-2020 | new | 21,9 | 56,4     | 78,8        | 100,0       | 64,3        |             |
| 55      | independent CSA | 121 steam    | kolmi OP-Air M51010 BL  | FFP2 | 25-3-2020 | new | 10,4 | 63,9     | 85,5        | 99,9        | 64,9        |             |
| 59      | independent CSA | 121 steam    | kolmi OP-Air M51010 BL  | FFP2 | 25-3-2020 | new | 23,6 | 59,2     | 79,8        | 100,0       | 65,6        |             |
| 60      | independent CSA | 121 steam    | kolmi OP-Air M51010 BL  | FFP2 | 25-3-2020 | new | 20,8 | 61,1     | 82,3        | 100,0       | 66,0        |             |
| 57      | independent CSA | 121 steam    | kolmi OP-Air M51010 BL  | FFP2 | 25-3-2020 | new | 25,9 | 61,0     | 81,9        | 99,9        | 67,2        |             |
| 96      | Uni Hospital    | 121 steam    | kolmi OP-Air M51010 BL  | FFP2 | 27-3-2020 | new | 14,7 | 67,0     | 88,2        | 100,0       | 67,5        |             |
| 61      | independent CSA | 121 steam    | kolmi OP-Air M51010 BL  | FFP2 | 25-3-2020 | new | 25,0 | 63,2     | 83,2        | 100,0       | 67,9        |             |
| 96      | Uni Hospital    | 121 steam    | kolmi OP-Air M51010S BL | FFP2 | 28-3-2020 | new | 25,1 | 39,8     | 60,2        | 100,0       | 56,3        |             |
| 110     | Uni Hospital    | 121 steam    | kolmi OP-Air M51010S BL | FFP2 | 29-3-2020 | new | 28,4 | 43,0     | 61,2        | 98,1        | 57,7        |             |
| 111     | Uni Hospital    | 121 steam    | kolmi OP-Air M51010S BL | FFP2 | 29-3-2020 | new | 16,4 | 46,2     | 77,1        | 100,0       | 59,9        |             |
| 62      | independent CSA | 121 steam    | kolmi OP-Air M52010S WH | FFP2 | 25-3-2020 | new | 23,7 | 60,5     | 81,5        | 100,0       | 66,4        |             |
| 63      | independent CSA | 121 steam    | kolmi OP-Air M52010S WH | FFP2 | 25-3-2020 | new | 24,7 | 61,8     | 81,8        | 99,9        | 67,0        |             |
| 398     | hospital        | 121 steam    | Kolmi Wit               | FFP2 | 15-4-2020 | new | 33,7 | 53,4     | 72,0        | 99,5        | 64,7        |             |
|         |                 |              |                         |      |           |     | MEAN | 21,2     | 56,3        | 78,4        | 99,8        | 63,9        |
|         |                 |              |                         |      |           |     | SD   | 6,892601 | 8,516484613 | 8,166783744 | 0,483126767 | 3,719208149 |
| 1xH2O2  |                 |              |                         |      |           |     |      |          |             |             |             |             |
| 78      | Uni Hospital    | H2O2 sterrad | kolmi OP-Air M51010 BL  | FFP2 | 27-3-2020 | new | 90,7 | 97,2     | 99,0        | 99,2        | 96,5        |             |
| 95      | Uni Hospital    | H2O2 sterrad | kolmi OP-Air M51010 BL  | FFP2 | 27-3-2020 | new | 90,1 | 97,2     | 99,0        | 100,0       | 96,6        |             |
| 79      | Uni Hospital    | H2O2 sterrad | kolmi OP-Air M51010 BL  | FFP2 | 27-3-2020 | new | 89,9 | 99,7     | 98,6        | 99,2        | 96,8        |             |
| 115     | Uni Hospital    | H2O2 sterrad | kolmi OP-Air M52010 WH  | FFP2 | 30-3-2020 | new | 87,8 | 95,1     | 97,6        | 99,8        | 95,1        |             |
| 119     | Uni Hospital    | H2O2 sterrad | kolmi OP-Air M52010 WH  | FFP2 | 30-3-2020 | new | 87,8 | 95,1     | 97,6        | 99,8        | 95,1        |             |
| 120     | Uni Hospital    | H2O2 sterrad | kolmi OP-Air M52010 WH  | FFP2 | 30-3-2020 | new | 88,1 | 94,8     | 98,0        | 100,0       | 95,2        |             |
| 121     | Uni Hospital    | H2O2 sterrad | kolmi OP-Air M52010 WH  | FFP2 | 30-3-2020 | new | 88,7 | 95,1     | 98,1        | 100,0       | 95,5        |             |
| 116     | Uni Hospital    | H2O2 sterrad | kolmi OP-Air M52010 WH  | FFP2 | 30-3-2020 | new | 90,8 | 96,4     | 98,3        | 100,0       | 96,4        |             |
| 114     | Uni Hospital    | H2O2 sterrad | kolmi OP-Air M52010 WH  | FFP2 | 30-3-2020 | new | 91,2 | 96,2     | 98,9        | 100,0       | 96,6        |             |
| 118     | Uni Hospital    | H2O2 sterrad | kolmi OP-Air M52010 WH  | FFP2 | 30-3-2020 | new | 91,2 | 96,5     | 98,6        | 100,0       | 96,6        |             |
| 117     | Uni Hospital    | H2O2 sterrad | kolmi OP-Air M52010 WH  | FFP2 | 30-3-2020 | new | 91,5 | 96,7     | 98,5        | 100,0       | 96,7        |             |
|         |                 |              |                         |      |           |     | MEAN | 89,8     | 96,4        | 98,4        | 99,8        | 96,1        |
|         |                 |              |                         |      |           |     | SD   | 1,438868 | 1,404887906 | 0,515359209 | 0,322884905 | 0,709256543 |
