# Supplementary material for: Can sterilization of disposable face masks be an alternative for imported face masks? A nationwide field study including 19 sterilization departments and 471 imported brand types during COVID-19 shortages
Source: PubMed Central journal article supplement (PMC8439445; doi:10.1371/journal.pone.0257468), 2021-09-14
Supplement: pone.0257468.s005.pdf [file pone.0257468.s005.pdf]

Comparison between CSSD's Supplemental file 5  
121 steam sterilisation at different sterilisation departments of the 3M Aura 1862+ffp2 mask

|     | brand and type       | protection level       | date arrived  | status | percentage of particles filtered |                    |                  |                  | NR   | ID1   | ID2  | ID3 | ID4 | ID5 | means | SD   |      |      |       |      |      |      |      |      |      |     |     |     |     |     |     |     |     |     |     |     |  |  |  |  |
|-----|----------------------|------------------------|---------------|--------|----------------------------------|--------------------|------------------|------------------|------|-------|------|-----|-----|-----|-------|------|------|------|-------|------|------|------|------|------|------|-----|-----|-----|-----|-----|-----|-----|-----|-----|-----|-----|--|--|--|--|
|     |                      |                        |               |        | 0.3µm filtered [%]               | 0.5µm filtered [%] | 1µm filtered [%] | 5µm filtered [%] |      |       |      |     |     |     |       | NR   | ID1  | ID2  | ID3   | ID4  | ID5  | SD   | SD   | SD   | SD   | SD  | SD  |     |     |     |     |     |     |     |     |     |  |  |  |  |
| 14  | Uni Hospital         | 121 steam              | 3M Aura 1862+ | FFP2   | 24-3-2020                        | new                | 92,2             | 97,2             | 99,3 | 100,0 | 97,2 |     |     |     |       | 93,1 | 97,6 | 99,4 | 100,0 | 97,5 | 4,0  | 1,1  | 1,2  | 1,3  | 1,4  | 1,5 | 0,9 | 0,4 | 0,1 | 0,0 | 0,3 |     |     |     |     |     |  |  |  |  |
| 15  | Uni Hospital         | 121 steam              | 3M Aura 1862+ | FFP2   | 24-3-2020                        | new                | 92,5             | 97,3             | 99,4 | 99,9  | 97,2 |     |     |     |       | 87,9 | 94,2 | 98,0 | 100,0 | 95,0 | 13   | 2,1  | 2,2  | 2,3  | 2,4  | 2,5 | 1,3 | 0,7 | 0,9 | 0,1 | 0,4 |     |     |     |     |     |  |  |  |  |
| 16  | Uni Hospital         | 121 steam              | 3M Aura 1862+ | FFP2   | 24-3-2020                        | new                | 94,0             | 98,0             | 99,6 | 100,0 | 97,9 |     |     |     |       | 94,8 | 99,5 | 99,6 | 98,1  | 97,9 | 7    | 3,1  | 3,2  | 3,3  | 3,4  | 3,5 | 2,5 | 0,8 | 0,3 | 0,8 | 1,0 |     |     |     |     |     |  |  |  |  |
| 17  | Uni Hospital         | 121 steam              | 3M Aura 1862+ | FFP2   | 24-3-2020                        | new                | 94,0             | 97,9             | 99,5 | 100,0 | 97,9 |     |     |     |       | 91,7 | 96,2 | 98,3 | 100,0 | 96,6 | 4    | 6,1  | 6,2  | 6,3  | 6,4  | 6,5 | 3,0 | 1,6 | 0,8 | 0,1 | 1,3 |     |     |     |     |     |  |  |  |  |
|     |                      |                        |               |        |                                  | SD                 | 93,1             | 97,6             | 99,4 | 100,0 | 97,5 |     |     |     | 4,0   | 1,1  | 1,2  | 1,3  | 1,4   | 1,5  | 96,9 | 98,9 | 99,6 | 99,7 | 98,8 | 6   | 7,1 | 7,2 | 7,3 | 7,4 | 7,5 | 0,5 | 0,3 | 0,1 | 0,4 | 0,2 |  |  |  |  |
|     |                      |                        |               |        |                                  |                    | 1,0              | 0,4              | 0,1  | 0,1   | 0,4  |     |     |     |       | 95,9 | 98,3 | 99,3 | 99,4  | 98,2 | 12   | 4,1  | 4,2  | 4,3  | 4,4  | 4,5 | 2,0 | 1,1 | 0,5 | 0,8 | 1,0 |     |     |     |     |     |  |  |  |  |
|     |                      |                        |               |        |                                  |                    | 89,0             | 94,9             | 97,7 | 100,0 | 95,4 |     |     |     |       | 96,4 | 99,0 | 99,5 | 99,9  | 98,7 | 12   | 5,1  | 5,2  | 5,3  | 5,4  | 5,5 | 4,2 | 0,6 | 0,3 | 0,2 | 1,1 |     |     |     |     |     |  |  |  |  |
| 36  | Uni Hospital         | 121 steam              | 3M Aura 1862+ | FFP2   | 25-3-2020                        | used               | 87,3             | 94,2             | 97,4 | 100,0 | 94,7 |     |     |     |       |      |      |      |       |      |      |      |      |      |      |     |     |     |     |     |     |     |     |     |     |     |  |  |  |  |
| 37  | Uni Hospital         | 121 steam              | 3M Aura 1862+ | FFP2   | 25-3-2020                        | used               | 89,0             | 94,9             | 97,7 | 100,0 | 95,4 |     |     |     |       |      |      |      |       |      |      |      |      |      |      |     |     |     |     |     |     |     |     |     |     |     |  |  |  |  |
| 38  | Uni Hospital         | 121 steam              | 3M Aura 1862+ | FFP2   | 25-3-2020                        | used               | 86,0             | 93,1             | 99,7 | 100,0 | 94,7 |     |     |     |       |      |      |      |       |      |      |      |      |      |      |     |     |     |     |     |     |     |     |     |     |     |  |  |  |  |
| 39  | Uni Hospital         | 121 steam              | 3M Aura 1862+ | FFP2   | 25-3-2020                        | used               | 87,7             | 93,9             | 97,2 | 100,0 | 94,7 |     |     |     |       |      |      |      |       |      |      |      |      |      |      |     |     |     |     |     |     |     |     |     |     |     |  |  |  |  |
| 40  | Uni Hospital         | 121 steam              | 3M Aura 1862+ | FFP2   | 25-3-2020                        | used               | 86,0             | 93,1             | 99,7 | 100,0 | 94,7 |     |     |     |       |      |      |      |       |      |      |      |      |      |      |     |     |     |     |     |     |     |     |     |     |     |  |  |  |  |
| 41  | Uni Hospital         | 121 steam              | 3M Aura 1862+ | FFP2   | 25-3-2020                        | used               | 87,7             | 93,9             | 97,2 | 100,0 | 94,7 |     |     |     |       |      |      |      |       |      |      |      |      |      |      |     |     |     |     |     |     |     |     |     |     |     |  |  |  |  |
| 42  | Uni Hospital         | 121 steam              | 3M Aura 1862+ | FFP2   | 25-3-2020                        | used               | 89,3             | 94,8             | 97,8 | 100,0 | 95,5 |     |     |     |       |      |      |      |       |      |      |      |      |      |      |     |     |     |     |     |     |     |     |     |     |     |  |  |  |  |
| 43  | Uni Hospital         | 121 steam              | 3M Aura 1862+ | FFP2   | 25-3-2020                        | used               | 89,7             | 95,1             | 97,9 | 100,0 | 95,7 |     |     |     |       |      |      |      |       |      |      |      |      |      |      |     |     |     |     |     |     |     |     |     |     |     |  |  |  |  |
| 44  | Uni Hospital         | 121 steam              | 3M Aura 1862+ | FFP2   | 25-3-2020                        | used               | 87,7             | 93,9             | 97,2 | 100,0 | 94,7 |     |     |     |       |      |      |      |       |      |      |      |      |      |      |     |     |     |     |     |     |     |     |     |     |     |  |  |  |  |
| 45  | Uni Hospital         | 121 steam              | 3M Aura 1862+ | FFP2   | 25-3-2020                        | used               | 86,0             | 93,1             | 99,7 | 100,0 | 94,7 |     |     |     |       |      |      |      |       |      |      |      |      |      |      |     |     |     |     |     |     |     |     |     |     |     |  |  |  |  |
| 46  | Uni Hospital         | 121 steam              | 3M Aura 1862+ | FFP2   | 25-3-2020                        | used               | 87,7             | 93,9             | 97,2 | 100,0 | 94,7 |     |     |     |       |      |      |      |       |      |      |      |      |      |      |     |     |     |     |     |     |     |     |     |     |     |  |  |  |  |
| 47  | Uni Hospital         | 121 steam              | 3M Aura 1862+ | FFP2   | 25-3-2020                        | used               | 89,3             | 94,8             | 97,8 | 100,0 | 95,5 |     |     |     |       |      |      |      |       |      |      |      |      |      |      |     |     |     |     |     |     |     |     |     |     |     |  |  |  |  |
| 48  | Uni Hospital         | 121 steam              | 3M Aura 1862+ | FFP2   | 25-3-2020                        | used               | 89,7             | 95,1             | 97,9 | 100,0 | 95,7 |     |     |     |       |      |      |      |       |      |      |      |      |      |      |     |     |     |     |     |     |     |     |     |     |     |  |  |  |  |
|     |                      |                        |               |        |                                  |                    | 87,9             | 94,2             | 98,0 | 100,0 | 95,0 |     |     |     |       |      |      |      |       |      |      |      |      |      |      |     |     |     |     |     |     |     |     |     |     |     |  |  |  |  |
|     |                      |                        |               |        |                                  |                    | 1,4              | 0,7              | 1,0  | 0,0   | 0,4  |     |     |     |       |      |      |      |       |      |      |      |      |      |      |     |     |     |     |     |     |     |     |     |     |     |  |  |  |  |
| 80  | Uni Hospital         | 122 steam              | 3M Aura 1862+ | FFP2   | 27-3-2020                        | new                | 99,2             | 99,8             | 99,9 | 100,0 | 99,7 |     |     |     |       |      |      |      |       |      |      |      |      |      |      |     |     |     |     |     |     |     |     |     |     |     |  |  |  |  |
| 83  | Uni Hospital         | 121 steam              | 3M Aura 1862+ | FFP2   | 27-3-2020                        | new                | 93,7             | 98,1             | 99,3 | 100,0 | 97,8 |     |     |     |       |      |      |      |       |      |      |      |      |      |      |     |     |     |     |     |     |     |     |     |     |     |  |  |  |  |
| 84  | Uni Hospital         | 121 steam              | 3M Aura 1862+ | FFP2   | 27-3-2020                        | new                | 91,3             | 97,3             | 98,9 | 97,7  | 96,3 |     |     |     |       |      |      |      |       |      |      |      |      |      |      |     |     |     |     |     |     |     |     |     |     |     |  |  |  |  |
| 85  | Uni Hospital         | 121 steam              | 3M Aura 1862+ | FFP2   | 27-3-2020                        | new                | 95,3             | 98,8             | 99,7 | 100,0 | 98,4 |     |     |     |       |      |      |      |       |      |      |      |      |      |      |     |     |     |     |     |     |     |     |     |     |     |  |  |  |  |
| 86  | Uni Hospital         | 121 steam              | 3M Aura 1862+ | FFP2   | 27-3-2020                        | new                | 97,6             | 99,5             | 99,8 | 100,0 | 99,2 |     |     |     |       |      |      |      |       |      |      |      |      |      |      |     |     |     |     |     |     |     |     |     |     |     |  |  |  |  |
| 87  | Uni Hospital         | 121 steam              | 3M Aura 1862+ | FFP2   | 27-3-2020                        | new                | 93,7             | 98,2             | 99,5 | 100,0 | 97,8 |     |     |     |       |      |      |      |       |      |      |      |      |      |      |     |     |     |     |     |     |     |     |     |     |     |  |  |  |  |
| 88  | Uni Hospital         | 121 steam              | 3M Aura 1862+ | FFP2   | 27-3-2020                        | new                | 93,3             | 98,1             | 99,5 | 99,8  | 97,7 |     |     |     |       |      |      |      |       |      |      |      |      |      |      |     |     |     |     |     |     |     |     |     |     |     |  |  |  |  |
|     |                      |                        |               |        |                                  |                    | 94,8             | 98,6             | 99,5 | 99,6  | 98,1 |     |     |     |       |      |      |      |       |      |      |      |      |      |      |     |     |     |     |     |     |     |     |     |     |     |  |  |  |  |
|     |                      |                        |               |        |                                  |                    | 2,7              | 0,9              | 0,3  | 0,8   | 1,1  |     |     |     |       |      |      |      |       |      |      |      |      |      |      |     |     |     |     |     |     |     |     |     |     |     |  |  |  |  |
| 207 | hospital             | 121 steam              | 3M Aura 1862+ | FFP2   | 7-4-2020                         | new                | 89               | 94               | 98   | 100   | 95,1 |     |     |     |       |      |      |      |       |      |      |      |      |      |      |     |     |     |     |     |     |     |     |     |     |     |  |  |  |  |
| 208 | hospital             | 121 steam              | 3M Aura 1862+ | FFP2   | 7-4-2020                         | new                | 89               | 95               | 98   | 100   | 95,4 |     |     |     |       |      |      |      |       |      |      |      |      |      |      |     |     |     |     |     |     |     |     |     |     |     |  |  |  |  |
| 209 | hospital             | 121 steam              | 3M Aura 1862+ | FFP2   | 7-4-2020                         | new                | 96               | 98               | 99   | 100   | 98,3 |     |     |     |       |      |      |      |       |      |      |      |      |      |      |     |     |     |     |     |     |     |     |     |     |     |  |  |  |  |
| 210 | hospital             | 121 steam              | 3M Aura 1862+ | FFP2   | 7-4-2020                         | new                | 94               | 97               | 99   | 100   | 97,4 |     |     |     |       |      |      |      |       |      |      |      |      |      |      |     |     |     |     |     |     |     |     |     |     |     |  |  |  |  |
|     |                      |                        |               |        |                                  |                    | 91,7             | 96,2             | 98,3 | 100,0 | 96,6 |     |     |     |       |      |      |      |       |      |      |      |      |      |      |     |     |     |     |     |     |     |     |     |     |     |  |  |  |  |
|     |                      |                        |               |        |                                  |                    | 3,4              | 1,9              | 0,9  | 0,0   | 1,6  |     |     |     |       |      |      |      |       |      |      |      |      |      |      |     |     |     |     |     |     |     |     |     |     |     |  |  |  |  |
| 290 | general practitioner | steam (23min home sys) | 3M Aura 1862+ | FFP2   | 9-4-2020                         | used               | 96               | 99               | 99   | 100   | 98,5 |     |     |     |       |      |      |      |       |      |      |      |      |      |      |     |     |     |     |     |     |     |     |     |     |     |  |  |  |  |
| 291 | general practitioner | steam (23min home sys) | 3M Aura 1862+ | FFP2   | 9-4-2020                         | used               | 97               | 99               | 99   | 100   | 98,7 |     |     |     |       |      |      |      |       |      |      |      |      |      |      |     |     |     |     |     |     |     |     |     |     |     |  |  |  |  |
| 292 | general practitioner | steam (23min home sys) | 3M Aura 1862+ | FFP2   | 9-4-2020                         | used               | 98               | 99               | 100  | 100   | 99,2 |     |     |     |       |      |      |      |       |      |      |      |      |      |      |     |     |     |     |     |     |     |     |     |     |     |  |  |  |  |
| 293 | general practitioner | steam (23min home sys) | 3M Aura 1862+ | FFP2   | 9-4-2020                         | used               | 97               | 99               | 100  | 100   | 98,9 |     |     |     |       |      |      |      |       |      |      |      |      |      |      |     |     |     |     |     |     |     |     |     |     |     |  |  |  |  |
| 364 | general practitioner | steam (23min home sys) | 3M Aura 1862+ | FFP2   | 14-4-2020                        | new                | 96,6             | 99,1             | 99,7 | 99,4  | 98,7 |     |     |     |       |      |      |      |       |      |      |      |      |      |      |     |     |     |     |     |     |     |     |     |     |     |  |  |  |  |
| 365 | general practitioner | steam (23min home sys) | 3M Aura 1862+ | FFP2   | 14-4-2020                        | new                | 96,9             | 99,1             | 99,7 | 99,1  | 98,7 |     |     |     |       |      |      |      |       |      |      |      |      |      |      |     |     |     |     |     |     |     |     |     |     |     |  |  |  |  |
|     |                      |                        |               |        |                                  |                    | 96,9             | 98,9             | 99,6 | 99,7  | 98,8 |     |     |     |       |      |      |      |       |      |      |      |      |      |      |     |     |     |     |     |     |     |     |     |     |     |  |  |  |  |
|     |                      |                        |               |        |                                  |                    | 0,6              | 0,3              | 0,1  | 0,4   | 0,2  |     |     |     |       |      |      |      |       |      |      |      |      |      |      |     |     |     |     |     |     |     |     |     |     |     |  |  |  |  |
| 336 | Uni Hospital         | 121 steam              | 3M Aura 1862+ | FFP2   | 13-4-2020                        | used</             |                  |                  |      |       |      |     |     |     |       |      |      |      |       |      |      |      |      |      |      |     |     |     |     |     |     |     |     |     |     |     |  |  |  |  |
