# Supplementary material for: Can sterilization of disposable face masks be an alternative for imported face masks? A nationwide field study including 19 sterilization departments and 471 imported brand types during COVID-19 shortages
Source: PubMed Central journal article supplement (PMC8439445; doi:10.1371/journal.pone.0257468), 2021-09-14
Supplement: pone.0257468.s006.pdf [file pone.0257468.s006.pdf]

| new foreign masks tested on particle counter     | article counter | Supplemental file 6                                |                                                                      |                                         |                                         | MEAN (%) | Ordered from low to high              |                                       |         |         |         |         |                                |       |    |
|--------------------------------------------------|-----------------|----------------------------------------------------|----------------------------------------------------------------------|-----------------------------------------|-----------------------------------------|----------|---------------------------------------|---------------------------------------|---------|---------|---------|---------|--------------------------------|-------|----|
|                                                  |                 | Solar 3100 interface chamber<br>10/min<br>1 minute | 20 Liter/min @ 21 m/s<br>autor / Hornum / Adobeltsteen / D Robertson | percentage 0.3µm particles filtered [%] | percentage 0.5µm particles filtered [%] |          | percentage 1µm particles filtered [%] | percentage Smu particles filtered [%] | percent | percent | percent | percent | MEAN (%) FFP2 filter level [%] |       |    |
| chinese white no brand FFP2                      | Mask type       | Date                                               | Number of Samples                                                    | 77.7                                    | 89.2                                    | 94.8     | 99.9                                  | 90.4                                  | 1.19    | 4.18    | 6.22    | 69.10   | 23.35                          | 94.00 | 1  |
| polish HMD NRD                                   | FFP2            | 1-4-2020                                           | 3                                                                    | 83.4                                    | 94.7                                    | 98.3     | 99.3                                  | 93.9                                  | 3.02    | 9.66    | 17.65   | 72.34   | 29.81                          | 94.00 | 2  |
| China Holmar S01050                              | FFP2            | 1-4-2020                                           | 2                                                                    | 90.0                                    | 96.9                                    | 99.1     | 100.0                                 | 99.0                                  | 3.02    | 10.03   | 18.68   | 77.59   | 30.07                          | 94.00 | 3  |
| disposable face mask white label/unknown         | FFP2            | 1-4-2020                                           | 2                                                                    | 43.8                                    | 58.2                                    | 71.8     | 80.8                                  | 74.9                                  | 1.69    | 11.01   | 21.80   | 71.01   | 13.39                          | 94.00 | 4  |
| GB2626-2006                                      | FFP2 KN95       | 1-4-2020                                           | 2                                                                    | 5.9                                     | 10.5                                    | 17.7     | 86.8                                  | 30.1                                  | 5.13    | 10.46   | 24.20   | 81.42   | 33.53                          | 94.00 | 5  |
| white label                                      | FFP2 KN95       | 1-4-2020                                           | 2                                                                    | 78.9                                    | 91.7                                    | 96.2     | 99.9                                  | 91.7                                  | 5.25    | 10.83   | 26.04   | 82.40   | 33.53                          | 94.00 | 6  |
| Moldite Model 8287                               | FFP2 KN95       | 1-4-2020                                           | 2                                                                    | 47.0                                    | 62.0                                    | 71.9     | 99.9                                  | 89.5                                  | 5.17    | 6.49    | 14.95   | 73.24   | 23.35                          | 94.00 | 7  |
| China KN95 FFP2                                  | FFP2 KN95       | 30-3-2020                                          | 3                                                                    | 55.8                                    | 81.4                                    | 93.9     | 100.0                                 | 82.8                                  | 8.37    | 21.41   | 37.20   | 86.79   | 40.57                          | 94.00 | 8  |
| selfmade OK dook/KN95                            | FFP2 KN95       | 30-3-2020                                          | 3                                                                    | 95.0                                    | 96.2                                    | 98.0     | 99.9                                  | 98.9                                  | 8.27    | 22.09   | 37.65   | 85.21   | 42.27                          | 94.00 | 9  |
| china KN95 FFP2                                  | FFP2 KN95       | 30-3-2020                                          | 2                                                                    | 34.6                                    | 59.7                                    | 80.7     | 99.3                                  | 68.6                                  | 8.67    | 24.39   | 39.37   | 90.04   | 41.13                          | 94.00 | 10 |
| china EN149 2001 FFP2                            | FFP2 KN95       | 30-3-2020                                          | 2                                                                    | 45.1                                    | 64.1                                    | 82.9     | 99.6                                  | 72.9                                  | 9.15    | 24.39   | 41.29   | 90.52   | 44.33                          | 94.00 | 11 |
| YUBAY                                            | FFP2 KN95       | 30-3-2020                                          | 2                                                                    | 26.0                                    | 49.0                                    | 76.4     | 100.0                                 | 80.0                                  | 9.54    | 26.56   | 42.74   | 91.64   | 45.25                          | 94.00 | 12 |
| KN95                                             | FFP2 KN95       | 30-3-2020                                          | 3                                                                    | 84.9                                    | 93.9                                    | 98.2     | 100.0                                 | 94.3                                  | 11.06   | 26.55   | 44.24   | 91.67   | 45.25                          | 94.00 | 13 |
| KN95                                             | FFP2 KN95       | 30-3-2020                                          | 3                                                                    | 90.1                                    | 95.1                                    | 97.9     | 99.9                                  | 95.7                                  | 11.74   | 27.80   | 46.68   | 91.67   | 45.25                          | 94.00 | 14 |
| DONG GUAN Wei sheng medical tech                 | ZF KN95 FFP2    | 30-3-2020                                          | 3                                                                    | 53.4                                    | 80.7                                    | 93.4     | 99.7                                  | 81.8                                  | 11.74   | 28.21   | 46.68   | 91.67   | 45.25                          | 94.00 | 15 |
| Dongsheng Tian Hai Test Tech                     | FFP2 KN95       | 30-3-2020                                          | 2                                                                    | 61.0                                    | 90.3                                    | 97.0     | 100.0                                 | 76.4                                  | 11.27   | 28.91   | 48.83   | 91.64   | 46.37                          | 94.00 | 16 |
| GB2626-2006                                      | FFP2 KN95       | 31-3-2020                                          | 4                                                                    | 67.1                                    | 80.9                                    | 91.9     | 100.0                                 | 85.3                                  | 12.09   | 29.28   | 46.08   | 92.02   | 46.44                          | 94.00 | 17 |
| anon KN95 FFP2                                   | FFP2 KN95       | 31-3-2020                                          | 3                                                                    | 79.1                                    | 86.7                                    | 93.1     | 99.9                                  | 89.7                                  | 13.03   | 30.24   | 46.31   | 92.00   | 46.44                          | 94.00 | 18 |
| Chirurgisch mondmasker china                     | KN95            | 31-3-2020                                          | 1                                                                    | 79.4                                    | 96.2                                    | 98.4     | 99.2                                  | 91.4                                  | 13.80   | 30.36   | 46.45   | 92.73   | 46.44                          | 94.00 | 19 |
| unknown china                                    | KN95            | 31-3-2020                                          | 3                                                                    | 81.1                                    | 90.9                                    | 93.7     | 99.9                                  | 93.7                                  | 13.39   | 30.37   | 47.09   | 93.26   | 46.76                          | 94.00 | 20 |
| Honeywell 5209 FFP2 NRD D                        | FFP2            | 31-3-2020                                          | 2                                                                    | 87.6                                    | 92.0                                    | 95.2     | 99.1                                  | 93.5                                  | 14.91   | 30.73   | 47.40   | 93.70   | 47.54                          | 94.00 | 21 |
| HMD E110 FFP2 NRD D                              | FFP2            | 31-3-2020                                          | 2                                                                    | 86.6                                    | 90.7                                    | 96.6     | 99.6                                  | 96.6                                  | 14.98   | 30.76   | 47.40   | 93.70   | 47.54                          | 94.00 | 22 |
| GB2626-2006 Putan Jintilla clothing weaving FFP2 | FFP2            | 31-3-2020                                          | 2                                                                    | 45.6                                    | 68.1                                    | 85.0     | 99.9                                  | 74.9                                  | 15.28   | 31.13   | 48.84   | 93.82   | 48.33                          | 94.00 | 23 |
| mix and match N95 D FFP2                         | FFP2            | 31-3-2020                                          | 2                                                                    | 34.7                                    | 59.7                                    | 80.9     | 99.5                                  | 68.7                                  | 15.51   | 31.04   | 49.47   | 94.73   | 48.36                          | 94.00 | 24 |
| 3M Mould-Hoan N95 FFP2                           | FFP2            | 31-3-2020                                          | 2                                                                    | 18.2                                    | 37.2                                    | 58.2     | 99.0                                  | 59.3                                  | 15.66   | 31.04   | 49.47   | 94.73   | 48.36                          | 94.00 | 25 |
| Deltoplus brazil FFP2 (2)                        | FFP2            | 31-3-2020                                          | 1                                                                    | 90.7                                    | 96.5                                    | 99.1     | 100.0                                 | 96.6                                  | 16.87   | 33.45   | 51.25   | 94.84   | 48.72                          | 94.00 | 26 |
| Says FFP2-5 CA                                   | FFP2            | 31-3-2020                                          | 1                                                                    | 81.6                                    | 89.0                                    | 95.9     | 99.6                                  | 91.6                                  | 17.11   | 33.45   | 51.25   | 94.84   | 48.72                          | 94.00 | 27 |
| Romed                                            | FFP2            | 31-3-2020                                          | 1                                                                    | 59.2                                    | 76.5                                    | 89.6     | 100.0                                 | 81.3                                  | 17.56   | 34.71   | 53.51   | 94.97   | 49.20                          | 94.00 | 28 |
| Spectrum MX-2005                                 | FFP2            | 31-3-2020                                          | 1                                                                    | 64.6                                    | 96.4                                    | 97.0     | 99.0                                  | 96.0                                  | 17.64   | 34.95   | 53.51   | 95.02   | 49.20                          | 94.00 | 29 |
| China KN95 FFP2                                  | FFP2            | 31-3-2020                                          | 2                                                                    | 84.9                                    | 92.7                                    | 97.3     | 100.0                                 | 93.7                                  | 17.70   | 35.07   | 52.22   | 95.02   | 50.44                          | 94.00 | 30 |
| noname china KN95 GB2626-2006                    | FFP2            | 31-3-2020                                          | 2                                                                    | 82.1                                    | 90.7                                    | 96.5     | 99.7                                  | 92.2                                  | 17.81   | 35.20   | 52.26   | 95.18   | 50.53                          | 94.00 | 31 |
| MH Healthcare healthcare GB2626-2006             | FFP2            | 31-3-2020                                          | 2                                                                    | 85.2                                    | 96.5                                    | 100.0    | 100.0                                 | 96.2                                  | 18.51   | 35.49   | 52.28   | 95.26   | 50.53                          | 94.00 | 32 |
| BSI 9126-2006                                    | FFP2            | 31-3-2020                                          | 2                                                                    | 97.0                                    | 98.5                                    | 99.3     | 100.0                                 | 98.7                                  | 18.76   | 35.56   | 52.26   | 95.97   | 51.38                          | 94.00 | 33 |
| love surprise                                    | FFP2            | 31-3-2020                                          | 2                                                                    | 15.3                                    | 28.2                                    | 43.7     | 96.2                                  | 45.9                                  | 18.85   | 36.74   | 52.72   | 96.04   | 52.19                          | 94.00 | 34 |
| honeywell                                        | FFP2            | 31-3-2020                                          | 2                                                                    | 95.4                                    | 98.0                                    | 99.8     | 100.0                                 | 98.9                                  | 19.75   | 37.75   | 53.13   | 96.26   | 52.27                          | 94.00 | 35 |
| Chicare GB2626-2006                              | FFP2            | 1-4-2020                                           | 3                                                                    | 68.7                                    | 82.5                                    | 90.0     | 98.0                                  | 85.0                                  | 19.78   | 38.00   | 54.70   | 96.08   | 54.07                          | 94.00 | 36 |
| white label KN95 FFP2                            | FFP2            | 1-4-2020                                           | 2                                                                    | 70.9                                    | 83.2                                    | 91.4     | 100.0                                 | 86.4                                  | 20.42   | 41.35   | 56.06   | 96.08   | 54.70                          | 94.00 | 37 |
| GB2626-2006 KN95 FFP2 MB D                       | FFP2            | 1-4-2020                                           | 1                                                                    | 96.3                                    | 98.1                                    | 99.6     | 100.0                                 | 99.9                                  | 21.27   | 41.96   | 56.76   | 96.65   | 55.25                          | 94.00 | 38 |
| ZF mark GB2626-2006 KN95 FFP2                    | FFP2            | 1-4-2020                                           | 1                                                                    | 60.4                                    | 87.6                                    | 95.2     | 98.0                                  | 85.3                                  | 21.72   | 42.05   | 57.13   | 96.22   | 55.94                          | 94.00 | 39 |
| white label                                      | FFP2            | 1-4-2020                                           | 2                                                                    | 91.4                                    | 95.3                                    | 97.7     | 99.9                                  | 96.1                                  | 21.82   | 42.61   | 57.95   | 96.25   | 56.40                          | 94.00 | 40 |
| Chirurgisch mondmasker special fit               | FFP2            | 1-4-2020                                           | 1                                                                    | 66.9                                    | 98.2                                    | 99.3     | 100.0                                 | 99.3                                  | 21.94   | 44.52   | 60.50   | 96.25   | 56.40                          | 94.00 | 41 |
| China KN95                                       | FFP2            | 1-4-2020                                           | 1                                                                    | 92.5                                    | 94.9                                    | 96.3     | 99.9                                  | 96.9                                  | 22.55   | 44.79   | 60.57   | 96.31   | 56.81                          | 94.00 | 42 |
| Fox med                                          | FFP2            | 1-4-2020                                           | 3                                                                    | 86.0                                    | 94.1                                    | 97.7     | 96.2                                  | 93.5                                  | 22.88   | 44.79   | 60.75   | 96.40   | 56.89                          | 94.00 | 43 |
| CNDK KN95                                        | FFP2            | 1-4-2020                                           | 1                                                                    | 77.6                                    | 92.1                                    | 97.2     | 100.0                                 | 91.7                                  | 23.34   | 44.92   | 60.86   | 96.42   | 57.29                          | 94.00 | 44 |
| indland house fashion No label                   | FFP2            | 1-4-2020                                           | 1                                                                    | 77.6                                    | 92.1                                    | 97.2     | 100.0                                 | 91.7                                  | 23.67   | 45.86   | 60.86   | 96.48   | 56.86                          | 94.00 | 45 |
| JSP Martcare 1020A FFP2 CE 0086                  | FFP2            | 1-4-2020                                           | 3                                                                    | 83.6                                    | 91.3                                    | 94.9     | 98.0                                  | 91.9                                  | 24.30   | 46.00   | 61.30   | 96.56   | 57.75                          | 94.00 | 46 |
| White label KN95 Cup                             | FFP2            | 1-4-2020                                           | 2                                                                    | 83.0                                    | 93.3                                    | 97.1     | 99.4                                  | 93.2                                  | 24.92   | 46.00   | 61.97   | 96.73   | 58.62                          | 94.00 | 47 |
| Mask FFP2 KN95                                   | FFP2 & N95      | 1-4-2020                                           | 2                                                                    | 97.8                                    | 99.8                                    | 100.0    | 100.0                                 | 99.8                                  | 25.13   | 47.27   | 62.96   | 96.76   | 58.69                          | 94.00 | 48 |
| Mask FFP2 KN95                                   | FFP2 & N95      | 1-4-2020                                           | 2                                                                    | 37.5                                    | 65.6                                    | 82.1     | 99.7                                  | 71.3                                  | 25.31   | 46.79   | 63.85   | 96.80   | 58.98                          | 94.00 | 49 |
| Lian You S501 KN 95                              | KN 95           | 1-4-2020                                           | 1                                                                    | 96.8                                    | 99.3                                    | 99.8     | 99.9                                  | 99.0                                  | 25.94   | 48.98   | 64.04   | 96.81   | 59.12                          | 94.00 | 50 |
| KN 95                                            | KN 95           | 1-4-2020                                           | 1                                                                    | 90.7                                    | 96.1                                    | 98.6     | 99.6                                  | 96.2                                  | 26.51   | 47.09   | 64.04   | 96.87   | 59.05                          | 94.00 | 51 |
| BESTG B295 KN95                                  | KN95            | 1-4-2020                                           | 2                                                                    | 94.7                                    | 98.1                                    | 98.8     | 97.4                                  | 94.9                                  | 27.05   | 49.36   | 64.41   | 96.87   | 59.99                          | 94.00 | 52 |
| Health 2601 KN                                   | KN 95           | 1-4-2020                                           | 2                                                                    | 95.5                                    | 98.7                                    | 99.6     | 99.1                                  | 98.3                                  | 27.05   | 49.45   | 66.16   | 97.17   | 60.15                          | 94.00 | 53 |
| HDX FFP2                                         | FFP2            | 1-4-2020                                           | 2                                                                    | 85.7                                    | 95.0                                    | 98.3     | 99.9                                  | 94.6                                  | 27.17   | 49.72   | 66.43   | 97.24   | 60.88                          | 94.00 | 54 |
| mask (blue)                                      | FFP2            | 1-4-2020                                           | 2                                                                    | 89.2                                    | 96.4                                    | 98.2     | 99.9                                  | 98.7                                  | 27.48   | 50.18   | 66.96   | 97.27   | 61.56                          | 94.00 | 55 |
| Unbranded white cup                              | KN95            | 1-4-2020                                           | 2                                                                    | 97.4                                    | 98.8                                    | 99.5     | 99.0                                  | 99.0                                  | 27.26   | 50.54   | 67.29   | 97.27   | 61.61                          | 94.00 | 56 |
| Unknown PM2.5 KN 95                              | FFP2            | 1-4-2020                                           | 2                                                                    | 40.4                                    | 64.2                                    | 81.1     | 99.0                                  | 71.2                                  | 27.80   | 51.20   | 67.49   | 97.28   | 61.64                          | 94.00 | 57 |
| Intico KN95                                      | FFP2            | 1-4-2020                                           | 2                                                                    | 95.4                                    | 96.4                                    | 98.4     | 99.6                                  | 95.4                                  | 28.69   | 51.00   | 67.40   | 97.60   | 61.64                          | 94.00 | 58 |
| No Marking                                       | KN 95           | 1-4-2020                                           | 3                                                                    | 32.1                                    | 59.1                                    | 79.3     | 100.0                                 | 67.6                                  | 28.88   | 52.09   | 67.64   | 97.83   | 62.28                          | 94.00 | 59 |
| Unmarked                                         | KN 95           | 1-4-2020                                           | 3                                                                    | 56.4                                    | 81.5                                    | 93.2     | 99.4                                  | 82.6                                  | 30.44   | 52.44   | 67.72   | 97.86   | 62.42                          | 94.00 | 60 |
| 3M 8822 CE 2797                                  | FFP2            | 1-4-2020                                           | 2                                                                    | 90.0                                    | 99.3                                    | 99.3     | 99.9                                  | 99.3                                  | 31.14   | 53.66   | 68.38   | 97.85   | 62.57                          | 94.00 | 61 |
| Puffin II                                        | FFP2            | 1-4-2020                                           | 2                                                                    | 75.6                                    | 92.4                                    | 97.5     | 99.1                                  | 91.2                                  | 31.65   | 53.98   | 69.51   | 97.96   | 62.54                          | 94.00 | 62 |
| Puffin II                                        | FFP2            | 1-4-2020                                           | 2                                                                    | 92.3                                    | 97.1                                    | 99.0     | 99.7                                  | 97.1                                  | 31.75   | 53.65   | 69.55   | 97.98   | 62.54                          | 94.00 | 63 |
| Bei Wei Safety B702 FFP2 CE0134 (new)            | FFP2            | 1-4-2020                                           | 1                                                                    | 95.1                                    | 97.7                                    | 99.0     | 99.0                                  | 97.6                                  | 31.80   | 53.89   | 70.07   | 97.99   | 63.11                          | 94.00 | 64 |
| KN95 Mask Z0200262 0149                          | FFP2            | 1-4-2020                                           | 3                                                                    | 80.4                                    | 89.2                                    | 93.4     | 99.0                                  | 92.3                                  | 31.97   | 54.21   | 70.44   | 98.01   | 63.15                          | 94.00 | 65 |
| Landsiom KN96                                    | FFP2            | 1-4-2020                                           | 1                                                                    | 97.0                                    | 98.8                                    | 99.3     | 99.5                                  | 98.9                                  | 32.13   | 55.18   | 71.71   | 98.03   | 63.15                          | 94.00 | 66 |
| S. Sango M2020                                   | FFP2            | 1-4-2020                                           | 1                                                                    | 70.4                                    | 84.8                                    | 93.8     | 99.2                                  | 87.0                                  | 32.59   | 55.70   | 71.85   | 98.04   | 64.08                          | 94.00 | 67 |
| Zhongshan Guangshun Medical Instruments Tech     | FFP2            | 1-4-2020                                           | 2                                                                    | 57.0                                    | 83.0                                    | 93.9     | 99.9                                  | 87.4                                  | 32.68   | 56.00   | 71.90   | 98.14   | 64.09                          | 94.00 | 68 |
| Azorb                                            | FFP2            | 1-4-2020                                           | 2                                                                    | 69.3                                    | 86.9                                    | 98.1     | 99.7                                  | 97.9                                  | 32.75   | 56.64   | 72.30   | 98.23   |                                |       |    |

|                                           |      |           |    |               |              |              |              |              |             |             |             |             |             |             |             |     |
|-------------------------------------------|------|-----------|----|---------------|--------------|--------------|--------------|--------------|-------------|-------------|-------------|-------------|-------------|-------------|-------------|-----|
| Zhengzhou Ruipu                           | KN95 | 22-4-2020 | 2  | 43.0          | 44.8         | 51.3         | 56.9         | 59.0         | 71.97       | 86.99       | 93.78       | 99.96       | 87.73       | 94.00       | 231         |     |
| Winkat Han                                | KN95 | 22-4-2020 | 2  | 11.7          | 24.4         | 44.7         | 57.3         | 44.5         | 71.97       | 87.19       | 93.83       | 99.67       | 87.84       | 94.00       | 232         |     |
| Groene doks KN95                          | KN95 | 22-4-2020 | 1  | 86.3          | 89.2         | 96.9         | 98.9         | 97.8         | 72.09       | 87.24       | 93.88       | 99.67       | 87.91       | 94.00       | 233         |     |
| Bamboo                                    | KN95 | 22-4-2020 | 1  | 96.3          | 81.7         | 100.0        | 85.1         | 82.4         | 72.7        | 87.24       | 93.91       | 99.67       | 88.24       | 94.00       | 234         |     |
| Nomad                                     | KN95 | 22-4-2020 | 1  | 84.3          | 84.3         | 97.9         | 100.0        | 94.1         | 72.76       | 87.48       | 93.93       | 99.68       | 88.03       | 94.00       | 235         |     |
| RZLUR Groen masker                        | KN95 | 22-4-2020 | 1  | 98.7          | 98.9         | 97.4         | 93.8         | 97.2         | 73.80       | 87.57       | 94.06       | 99.68       | 88.21       | 94.00       | 236         |     |
| GLL D                                     | KN95 | 22-4-2020 | 1  | 84.4          | 88.4         | 87.4         | 87.4         | 81.4         | 75.7        | 87.4        | 93.7        | 97.4        | 88.21       | 94.00       | 237         |     |
| KN95 WR GB762-2006                        | KN95 | 22-4-2020 | 2  | 83.69701355   | 26.55477672  | 52.26089831  | 98.5694375   | 46.4         | 73.42       | 88.14       | 94.24       | 99.68       | 88.66       | 94.00       | 238         |     |
| Amrining 100.000                          | KN95 | 22-4-2020 | 2  | 71.96939173   | 91.53283732  | 96.96169923  | 100          | 90.3         | 73.62       | 88.30       | 94.26       | 99.68       | 88.86       | 94.00       | 239         |     |
| Amrining Suro                             | KN95 | 22-4-2020 | 2  | 91.25842067   | 91.25842067  | 91.25842067  | 91.25842067  | 91.25842067  | 91.25842067 | 91.25842067 | 91.25842067 | 91.25842067 | 91.25842067 | 91.25842067 | 91.25842067 | 240 |
| Mac Pharma ZM0220UK9312 FFP2              | KN95 | 22-4-2020 | 2  | 95.92452402   | 90.02208942  | 90.02208942  | 90.02208942  | 90.02208942  | 74.44       | 80.00       | 94.47       | 99.68       | 89.01       | 94.00       | 241         |     |
| Zhengzhou Ruipu                           | KN95 | 22-4-2020 | 2  | 42.99887197   | 44.78732048  | 51.25156399  | 96.87114953  | 59.0         | 74.67       | 89.11       | 94.47       | 99.70       | 89.22       | 94.00       | 242         |     |
| Zhengzhou Ruipu                           | KN95 | 22-4-2020 | 2  | 11.7389636    | 91.46709225  | 91.46709225  | 91.46709225  | 91.46709225  | 74.80       | 82.15       | 91.21       | 99.70       | 89.22       | 94.00       | 243         |     |
| Groene doks KN95                          | KN95 | 22-4-2020 | 1  | 98.29584068   | 99.23133499  | 98.92884468  | 96.02849811  | 94.1         | 75.06       | 89.19       | 94.60       | 99.70       | 89.46       | 94.00       | 244         |     |
| Wilson 9004                               | KN95 | 22-4-2020 | 1  | 90.01007318   | 96.94133555  | 98.6993114   | 95.17        | 89.20        | 75.17       | 89.20       | 94.61       | 99.70       | 89.58       | 94.00       | 245         |     |
| Bamboo                                    | KN95 | 22-4-2020 | 1  | 65.2790254    | 83.36171159  | 91.74268731  | 99.8156682   | 85.0         | 75.62       | 89.26       | 94.68       | 99.70       | 89.70       | 94.00       | 246         |     |
| Nomad                                     | KN95 | 22-4-2020 | 1  | 94.86336403   | 94.86336403  | 94.86336403  | 94.86336403  | 94.86336403  | 76.29       | 88.13       | 94.17       | 99.68       | 88.21       | 94.00       | 247         |     |
| RZLUR Groen masker                        | KN95 | 22-4-2020 | 1  | 98.68201778   | 98.85672391  | 97.35742452  | 94.83879068  | 97.4         | 77.57       | 89.52       | 94.73       | 99.71       | 89.79       | 94.00       | 248         |     |
| GLL D                                     | KN95 | 22-4-2020 | 1  | 48.44229271   | 75.60996858  | 88.3703137   | 99.44700461  | 78.0         | 77.69       | 89.66       | 94.75       | 99.71       | 90.12       | 94.00       | 249         |     |
| Lediboo PM2.5                             | KN95 | 22-4-2020 | 1  | 93.62355582   | 93.62355582  | 93.62355582  | 93.62355582  | 93.62355582  | 77.72       | 89.83       | 94.81       | 99.71       | 90.12       | 94.00       | 250         |     |
| Juyie surgical mask                       | KN95 | 24-4-2020 | 2  | 61.5717427    | 77.8917399   | 86.27800477  | 99.6644731   | 81.3         | 77.84       | 89.79       | 94.85       | 99.71       | 90.39       | 94.00       | 251         |     |
| Face mask KN95-A FFP2 NR                  | KN95 | 24-4-2020 | 2  | 72.7811577    | 86.86291693  | 92.56862369  | 99.91536183  | 88.0         | 78.13       | 90.04       | 94.87       | 99.71       | 90.44       | 94.00       | 252         |     |
| Halfsize surgical mask 200c NR            | KN95 | 24-4-2020 | 2  | 57.22709594   | 72.92292929  | 82.84848484  | 98.54787074  | 93.8         | 72.73       | 82.50       | 94.88       | 99.73       | 92.49       | 94.00       | 253         |     |
| Unifree surgical mask 100A NR             | KN95 | 24-4-2020 | 2  | 31.23557691   | 64.63544413  | 79.38253531  | 98.62468332  | 68.5         | 78.89       | 90.09       | 94.90       | 99.72       | 90.50       | 94.00       | 254         |     |
| S Ji Ji 5002                              | KN95 | 24-4-2020 | 2  | 97.43200052   | 99.40401506  | 99.62010692  | 99.82449982  | 99.1         | 78.90       | 90.18       | 94.94       | 99.72       | 90.54       | 94.00       | 255         |     |
| KSAFN FFP2 KN95                           | KN95 | 24-4-2020 | 2  | 14.97589971   | 35.58041235  | 52.22324269  | 99.87589971  | 91.3         | 79.11       | 90.39       | 94.96       | 99.72       | 90.54       | 94.00       | 256         |     |
| Ultrasonic CE FFP2 EN149                  | KN95 | 24-4-2020 | 2  | 97.01641739   | 94.26968565  | 96.8672293   | 99.90710636  | 94.5         | 79.25       | 90.30       | 94.97       | 99.73       | 90.62       | 94.00       | 257         |     |
| Safety Armor Swam FFP2                    | KN95 | 24-4-2020 | 2  | 63.5308238    | 78.31216879  | 85.1676536   | 99.94948995  | 81.7         | 79.38       | 90.69       | 95.07       | 99.73       | 90.64       | 94.00       | 258         |     |
| Seaman 2 Lm SH DE                         | KN95 | 24-4-2020 | 2  | 63.2646702    | 79.3674184   | 86.13012425  | 99.87277554  | 82.2         | 79.46       | 91.29       | 95.13       | 99.73       | 90.66       | 94.00       | 259         |     |
| KN95 Respirator Zien                      | KN95 | 24-4-2020 | 2  | 84.26600314   | 97.32323232  | 97.32323232  | 97.32323232  | 97.32323232  | 79.59       | 91.34       | 96.17       | 99.73       | 90.65       | 94.00       | 260         |     |
| KN95 Varnax                               | KN95 | 24-4-2020 | 2  | 54.81849252   | 74.06898758  | 83.27919734  | 99.79101112  | 78.0         | 79.59       | 91.38       | 95.18       | 99.74       | 91.01       | 94.00       | 261         |     |
| Weibum Mask KN95 (Capota)                 | KN95 | 24-4-2020 | 2  | 55.60054095   | 78.30404448  | 87.84332351  | 99.95493761  | 80.0         | 79.71       | 91.53       | 95.20       | 99.74       | 91.15       | 94.00       | 262         |     |
| daily respirator                          | KN95 | 24-4-2020 | 2  | 20.128120638  | 20.128120638 | 20.128120638 | 20.128120638 | 20.128120638 | 79.48       | 91.55       | 96.21       | 99.74       | 91.15       | 94.00       | 263         |     |
| merk 1 Jariford code ADC HV               | KN95 | 30-4-2020 | 2  | 93.1091549    | 10.02520323  | 26.0487691   | 95.0195988   | 33.5         | 79.94       | 91.55       | 96.21       | 99.74       | 91.15       | 94.00       | 264         |     |
| merk 2 KN95 merk patra ADC HV             | KN95 | 30-4-2020 | 2  | 98.0936954    | 99.38812373  | 99.74977288  | 100          | 99.9         | 79.97       | 91.73       | 96.24       | 99.75       | 91.36       | 94.00       | 265         |     |
| merk 3 KN95 Frank SH                      | KN95 | 30-4-2020 | 2  | 30.15648996   | 61.7537516   | 80.2677886   | 99.7867886   | 50.5         | 80.13       | 91.82       | 96.25       | 99.75       | 91.42       | 94.00       | 266         |     |
| merk 3 KN95 Frank BL S186073              | KN95 | 30-4-2020 | 2  | 63.65285425   | 74.31229531  | 82.52842617  | 99.31949643  | 80.0         | 80.62       | 91.88       | 96.25       | 99.75       | 91.42       | 94.00       | 267         |     |
| merk 5 Dinp BRNTH                         | KN95 | 30-4-2020 | 2  | 69.9016943    | 84.40831217  | 91.83132481  | 100          | 86.5         | 80.67       | 91.90       | 96.40       | 99.76       | 91.64       | 94.00       | 268         |     |
| merk 5 Dinp GR71                          | KN95 | 30-4-2020 | 2  | 37.20335277   | 61.84862523  | 76.70707919  | 99.18339571  | 80.0         | 81.25       | 93.01       | 96.40       | 99.76       | 92.01       | 94.00       | 269         |     |
| shenzhen Health Technology city sparkling | KN95 | 29-4-2020 | 2  | 53.05842024   | 70.86886666  | 79.43226237  | 99.44154202  | 75.0         | 81.54       | 91.01       | 96.40       | 99.77       | 90.69       | 94.00       | 270         |     |
| Lian You Hartje logo                      | KN95 | 29-4-2020 | 2  | 21.82486889   | 41.49575128  | 67.48719174  | 99.16804403  | 67.0         | 81.82       | 91.99       | 96.40       | 99.77       | 91.72       | 94.00       | 271         |     |
| RNE                                       | KN95 | 29-4-2020 | 2  | 69.1610811    | 86.6988427   | 94.6650423   | 99.57366541  | 80.0         | 81.86       | 92.00       | 96.73       | 99.77       | 91.86       | 94.00       | 272         |     |
| tomson new FFP2                           | KN95 | 29-4-2020 | 2  | 29.56835303   | 45.9501322   | 68.4630323   | 99.67068158  | 96.8         | 80.23       | 92.09       | 97.79       | 99.77       | 91.95       | 94.00       | 273         |     |
| SPRO medical FFP2                         | KN95 | 29-4-2020 | 2  | 24.91558849   | 52.97581232  | 75.85939667  | 98.3521046   | 63.0         | 82.08       | 92.10       | 98.88       | 99.77       | 92.06       | 94.00       | 274         |     |
| SPRO medical FFP2                         | KN95 | 29-4-2020 | 2  | 97.08015741   | 99.49373736  | 99.69772548  | 99.81424149  | 99.0         | 82.08       | 92.12       | 98.88       | 99.78       | 92.06       | 94.00       | 275         |     |
| S.Sargo (1) FFP2 CE703                    | KN95 | 29-4-2020 | 2  | 56.93983764   | 73.2297848   | 83.3711691   | 99.63833635  | 78.3         | 82.34       | 92.46       | 96.00       | 99.78       | 92.23       | 94.00       | 276         |     |
| Soliciflex FFP2                           | KN95 | 29-4-2020 | 2  | 98.8067737    | 99.66509309  | 99.62501648  | 99.87945455  | 99.4         | 82.40       | 92.46       | 96.00       | 99.78       | 92.26       | 94.00       | 277         |     |
| Self-inflating protective mask (3) FFP2   | KN95 | 29-4-2020 | 2  | 27.1710820711 | 42.66676578  | 66.86676578  | 99.84707124  | 93.8         | 82.40       | 92.46       | 96.00       | 99.78       | 92.26       | 94.00       | 278         |     |
| GH KN95 (4) FFP2                          | KN95 | 29-4-2020 | 2  | 85.81000114   | 93.9688284   | 96.41861763  | 99.56672444  | 93.8         | 82.50       | 92.53       | 96.14       | 99.79       | 92.42       | 94.00       | 279         |     |
| soliciflex (5) FFP2                       | KN95 | 29-4-2020 | 2  | 83.28386968   | 92.73380418  | 95.9959123   | 99.7838222   | 92.9         | 82.56       | 92.54       | 96.21       | 99.79       | 92.50       | 94.00       | 280         |     |
| merk 1 Jariford code ADC HV               | KN95 | 30-4-2020 | 1  | 3.0195149     | 10.02520323  | 26.0487691   | 95.0195988   | 33.5         | 83.05       | 92.68       | 96.21       | 99.79       | 92.56       | 94.00       | 281         |     |
| merk 2 KN95 merk patra ADC HV             | KN95 | 30-4-2020 | 1  | 98.0936954    | 99.38812373  | 99.74977288  | 100          | 99.9         | 83.05       | 92.77       | 96.22       | 99.80       | 92.56       | 94.00       | 282         |     |
| merk 3 KN95 Frank SH                      | KN95 | 30-4-2020 | 1  | 17.56469806   | 34.5082745   | 51.51233852  | 99.84707124  | 93.8         | 83.28       | 92.73       | 96.20       | 99.80       | 92.65       | 94.00       | 283         |     |
| merk 4 KN95 Frank BL S186073              | KN95 | 30-4-2020 | 1  | 63.65285425   | 74.31229531  | 82.52462617  | 99.31949643  | 80.0         | 83.31       | 92.97       | 96.23       | 99.80       | 92.83       | 94.00       | 284         |     |
| merk 5 Dinp BRNTH                         | KN95 | 30-4-2020 | 1  | 69.9016943    | 84.40831217  | 91.83132481  | 100          | 86.5         | 83.43       | 93.02       | 96.41       | 99.80       | 92.95       | 94.00       | 285         |     |
| merk 5 Dinp GR71                          | KN95 | 30-4-2020 | 1  | 37.05135277   | 61.82463253  | 76.70707919  | 99.18339571  | 80.0         | 83.43       | 93.01       | 96.41       | 99.80       | 92.95       | 94.00       | 286         |     |
| chinese KN95 FFP2                         | KN95 | 30-4-2020 | 2  | 8.66729753    | 22.88684666  | 35.6223095   | 96.47924275  | 41.4         | 83.47       | 93.04       | 96.40       | 99.81       | 93.10       | 94.00       | 287         |     |
| 1001202 chinese KN95 FFP2                 | KN95 | 30-4-2020 | 2  | 90.63063533   | 96.162125    | 98.043125    | 99.82054482  | 96.2         | 83.63       | 93.14       | 96.40       | 99.81       | 93.10       | 94.00       | 288         |     |
| konin med chinese KN95 FFP2               | KN95 | 30-4-2020 | 2  | 86.2672058    | 93.0250915   | 95.309338    | 95.97141001  | 92.6         | 83.95       | 93.16       | 96.40       | 99.81       | 93.17       | 94.00       | 289         |     |
| ABC KN95 FACE mask FFP2 (ABC 1)           | KN95 | 30-4-2020 | 2  | 98.63917255   | 99.33901682  | 99.58809975  | 99.9697882   | 99.4         | 84.01       | 93.16       | 96.50       | 99.81       | 93.21       | 94.00       | 290         |     |
| ABC KN95 protective mask FFP2 (ABC 2)     | KN95 | 30-4-2020 | 2  | 70.80078819   | 82.51802523  | 91.28281232  | 99.82054482  | 77.6         | 84.01       | 93.19       | 96.50       | 99.81       | 93.20       | 94.00       | 291         |     |
| Bowen Bios protective mask (surgical)     | KN95 | 30-4-2020 | 2  | 90.45383855   | 97.95137338  | 98.98492024  | 99.32359569  | 96.6         | 84.29       | 93.45       | 96.50       | 99.82       | 93.30       | 94.00       | 292         |     |
| Airtac A002-KN95 RM                       | KN95 | 30-4-2020 | 2  | 99.62161043   | 98.08226101  | 98.86938821  | 99.35561832  | 98.0         | 84.29       | 93.47       | 96.44       | 99.82       | 93.39       | 94.00       | 293         |     |
| divers                                    | KN95 | 30-4-2020 | 2  | 47.28663386   | 71.0705245   | 83.95952624  | 98.36308097  | 75.1         | 84.30       | 93.47       | 96.44       | 99.82       | 93.43       | 94.00       | 294         |     |
| divers                                    | KN95 | 30-4-2020 | 6  | 50.66196415   | 72.9953232   | 82.788974    | 99.29        | 84.29        | 84.29       | 93.48       | 96.44       | 99.82       | 93.48       | 94.00       | 295         |     |
| divers                                    | KN95 | 30-4-2020 | 10 | 48.59842378   | 66.641813    | 73.7277545   | 99.45166857  | 73.1         | 84.72       | 93.77       | 96.69       | 99.83       | 93.50       | 94.00       | 296         |     |
| Medline, Nantex200, FFP2 NR EN149         | KN95 | 1-5-2020  | 2  | 94.9579823    | 97.8414781   | 99.0480472   | 99.97941963  | 98.0         | 84.72       | 93.78       | 96.70       | 99.83       | 93.53       | 94.00       | 297         |     |
| Medline, L255, FFP2 NR EN149:2001 CE0212  | KN95 | 1-5-2020  | 2  | 85.365487184  | 95.365487184 | 95.365487184 | 95.36        |              |             |             |             |             |             |             |             |     |

Medline  
Tidakkang

KN95  
N95 (GB2626-2006) Non-medical

22-5-2022 2  
22-5-2022 2

68,76500622 84,93856978 91,97828709 99,55116697 86,3  
90,10049553 97,06062075 98,75425565 100 96,5

99,96 99,93 99,93 100,00 99,92 94,00 474  
mean 83,3057  
SD 16,00158
